# Growth Hormone's Links to Cancer

Cesar Luiz Boguszewski<sup>1</sup> and Margaret Cristina da Silva Boguszewski<sup>2</sup>

<sup>1</sup>Department of Internal Medicine, Endocrine Division (SEMPR), University Hospital, Federal University of Parana, 80030-110 Curitiba, Brazil; and <sup>2</sup>Department of Pediatrics, Endocrine Division (SEMPR), University Hospital, Federal University of Parana, 80030-110 Curitiba, Brazil

**ORCID numbers:** 0000-0001-7285-7941 (C. L. Boguszewski); 0000-0002-5306-0715 (M. C. d. S. Boguszewski).

**ABSTRACT** Several components of the GH axis are involved in tumor progression, and GH-induced intracellular signaling has been strongly associated with breast cancer susceptibility in genome-wide association studies. In the general population, high IGF-I levels and low IGF-binding protein-3 levels within the normal range are associated with the development of common malignancies, and components of the GH-IGF signaling system exhibit correlations with clinical, histopathological, and therapeutic parameters in cancer patients. Despite promising findings in preclinical studies, anticancer therapies targeting the GH-IGF signaling system have led to disappointing results in clinical trials. There is substantial evidence for some degree of protection against tumor development in several animal models and in patients with genetic defects associated with GH deficiency or resistance. In contrast, the link between GH excess and cancer risk in acromegaly patients is much less clear, and cancer screening in acromegaly has been a highly controversial issue. Recent studies have shown that increased life expectancy in acromegaly patients who attain normal GH and IGF-I levels is associated with more deaths due to age-related cancers. Replacement GH therapy in GH deficiency hypopituitary adults and short children has been shown to be safe when no other risk factors for malignancy are present. Nevertheless, the use of GH in cancer survivors and in short children with RASopathies, chromosomal breakage syndromes, or DNA-repair disorders should be carefully evaluated owing to an increased risk of recurrence, primary cancer, or second neoplasia in these individuals. (*Endocrine Reviews* 40: 558 – 574, 2019)

**G**H is a protein synthesized by the somatotroph cells of the anterior pituitary and represents 800-fold the amount of any of the other pituitary hormones (1, 2). Also, GH can be locally secreted by many other extrapituitary human tissues, where it exerts autocrine or paracrine actions (3). At target cells, two distinct sites of GH bind to the extracellular domains of the predimerized GH receptor (GHR) (4, 5). Activation of the GHR triggers tyrosine phosphorylation of receptor-associated Janus kinase-2 and other substrates, such as signal transducer and activator of transcription (STAT)5, which are mediators of genomic GH actions and might be involved in oncogenesis (6). Additionally, GH activates other mitogenic pathways, such as MAPK/ERK, Ras-like GTPases, and insulin (INS) receptor substrate/phosphoinositide 3-kinase (PI3K)/protein kinase B (Akt), and it interacts with focal adhesion kinases that permits the GH signal to be propagated through multiple alternate intracellular transduction pathways

(7, 8). GH has recently been shown to modify the tissue expression of miRNAs, which in turn regulate key components of the GH signaling system, implying a novel regulatory mechanism of GH expression and action (9).

GH is a main regulator of hepatic IGF-I production, which modulates GH release in a feedback loop (10). Several hormones and regulators of food intake and energy balance, such as INS, ghrelin, adipokines, free fatty acids, estrogen, thyroid hormones, and glucocorticoids, also influence pituitary GH secretion and hepatic IGF-I output (11). The liver is also the main source of IGF-II, which is secreted in a GH-independent manner in response to nutritional and hormonal factors (12). Both IGFs exert autocrine and paracrine effects in many extrahepatic tissues. Although IGF-I and IGF-II elicit similar biological responses, their expression patterns differ, with IGF-II preferentially expressed in a wide variety of tissues during fetal development and IGF-I mostly expressed

ISSN Print: 0163-769X

ISSN Online: 1945-7189

Printed in USA

Copyright © 2019

Endocrine Society

Received: 28 June 2018

Accepted: 23 October 2018

First Published Online:

30 November 2018

### ESSENTIAL POINTS

- GH-induced intracellular signaling pathways are the third most highly associated with breast cancer susceptibility
- Attenuation of GH and IGF effects in mice and humans protect against cancer
- Age-related cancers are becoming a leading cause of death in acromegaly patients with biochemically controlled disease
- GH therapy is safe in children without risk factors for cancer
- Anticancer therapies targeting the GH-IGF system have yet to prove their usefulness

in the liver after birth, with a progressive age-related decline after puberty (12–14).

The IGF signaling mechanisms involve a complex system formed by three ligands (IGF-I, IGF-II, and INS), six membrane receptors [IGF-IR, IGF-IIR, INS receptor (INS-R), and the IGF-I/INS hybrid receptors], six high-affinity binding proteins [IGF-binding protein (IGFBP)-1 to IGFBP-6], a family of lower affinity IGFBP-related proteins, and several proteases (14–16). Upon binding to IGFs, IGF-IR undergoes autophosphorylation, followed by binding and phosphorylation of INS-R substrate proteins and recruitment of other effectors responsible to ultimately activate MAPK and PI3K/Akt signaling cascades. The MAPK pathway involves Ras/ERK activity and is mainly associated with the mitogenic effects of IGFs and INS, whereas PI3K/Akt mediate metabolic and cell growth responses, the latter via the mammalian target of rapamycin pathway (14, 16–18). In contrast, following binding to its receptor, IGF-II is internalized and degraded, without transducing intracellular signals, a

process that reduces its tissue availability and prevents its activity via IGF-IR and INS-R (12). Although GH and IGF-I effects are frequently interconnected, GH also exerts IGF-I-independent actions in muscle, bone, and adipose tissue, sometimes involving other intermediates, such as hepatocyte growth factor in the liver, fibroblast growth factor in the chondrocyte, epidermal growth factor in the kidney, or interleukins in bone and immune cells (19). Additionally, GH promotes lipolysis, blocks lipogenesis, and has diabetogenic effects, whereas IGF-I has opposing effects on glucose and lipid metabolism (7, 20).

A wealth of evidence linking GH and carcinogenesis has been produced from experimental, epidemiological, genetic, and clinical studies, both in animal models and humans. Consequently, several components of the GH signaling system have been investigated as targets for new cancer therapies. The same reasoning has served as the rationale for the debate on cancer risk during GH therapy and in patients with acromegaly.

### GH-IGF-I Axis in Cancer

Malignant transformation of normal to cancer cells involves disruption of key cellular processes (Fig. 1). Growth factors do not directly lead to malignant transformation, but they can help to increase the risk of mutation by reducing time for DNA repair during rapid progression of the cell cycle. In rodents, GH/IGF-I influences cellular DNA repair capacity during a critical period during early life, presumably by transcriptional control of genes involved in DNA repair (21). However, the components of the GH-IGF system might exert contrasting effects in these events. Although GH, IGFs, and convertases may favor tumor development by promoting cell proliferation, the epithelial-to-mesenchymal transition (EMT), and angiogenesis, as well as by inhibiting apoptosis, other factors, such as IGFBPs, proteases, and IGF-IIR, may protect against tumor progression by inhibiting mitogenesis and stimulating apoptosis (14, 18, 22–24). Curiously, GH stimulates both IGF-I and IGFBP-3 production, simultaneously inducing signaling pathways for cell growth that compete with others for cell

death. Considering that GH is able to disrupt the balance of these opposed forces, potentially leading to development of neoplasia, how and when GH is involved in this process are key questions that remain unanswered. The whole picture is complicated by the effects of autocrine/paracrine GH, IGFs, and IGFBPs through their local production by neoplastic cells (and other cells in the tumor micro-environment), the tumor expression of GHRH, GHRH receptor (GHRH-R), and its splice variant SV1, IGF-IR and IGF-IIR, deregulation of miRNAs induced by GH and IGFs, and the presence of nuclear GHR, all of which may participate in the progression of various malignancies (7, 25–27).

#### Breast cancer

Endocrine and autocrine/paracrine GH influences growth of the normal mammary glands and the process of lactation, acting both alone and in conjunction with estrogen and progesterone (28, 29). In humans, GH can also bind and activate the prolactin receptor (PRLR), and in breast cancer cells, GHR may form heterodimers with the PRLR, modulating GH signal transduction (9).

**Figure 1.** Schematic representation of (a) mechanisms involved in normal cell growth and (b) the role of the GH-IGF system in cancer development. Normal cell growth is controlled by the balance between genes that promote cell proliferation (oncogenes) and tumor suppressor genes that break cell division. Apoptosis, DNA repair, and elimination of senescent cells are mechanisms that protect against neoplasia. Accumulated mutations in normal cells due to genetic, environmental, or pathological factors disrupt these protective mechanisms, resulting in uncontrolled proliferation of neoplastic cells. As tumor progresses, cells grow rapidly and autonomously and may acquire properties of invasion and metastasis, which are facilitated by the EMT, the presence of malignant stem cells, and angiogenesis. GH, IGFs, and convertases may favor tumor development by increasing the risk of mutation, stimulating cell proliferation, senescence, EMT, angiogenesis, invasion, and metastasis, and by inhibiting apoptosis and DNA repair. IGFBPs, IGF-IIR, and proteases may exert opposite effects and protect against cancer. Additionally, tumor expression and autocrine effects of several components of the GH-IGF system, deregulation of miRNAs induced by GH and IGFs, and the presence of nuclear GHR are other events that might contribute to malignant transformation and progression.

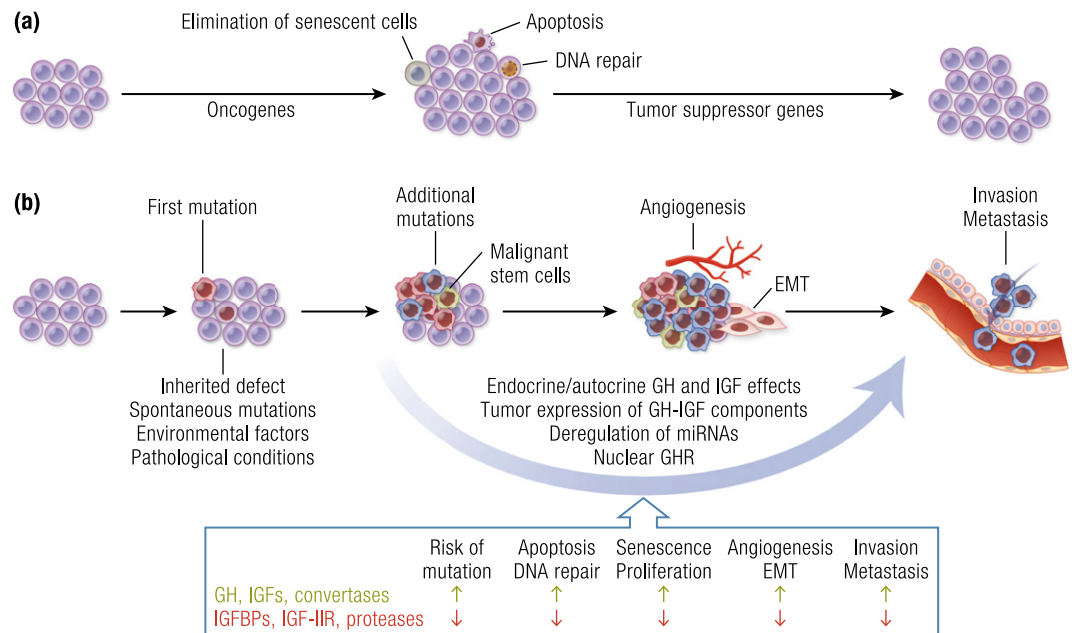

Many effects of GH on mammary development are mediated by IGF-I, particularly locally produced IGF-I, but GH can also exert IGF-I-independent proliferative effects in breast cancer cell lines (28, 30). GH has been shown to enhance breast cancer cell proliferation, survival, migration, invasion, and vascularization, to promote stemness of breast cancer stem cells, and to induce chemoresistance, favoring metastatic growth even in estrogen receptor-negative mammary carcinomas (29, 31–33). Interestingly, gene expression may be differently regulated in breast cancer cells by exogenous and autocrine GH, with the latter promoting a more aggressive cellular phenotype (26, 34). In humans, higher GHR expression has been observed in breast cancer cells, and tumor expression of GH has been positively associated with metastatic breast cancer and poor prognosis (35, 36). Overexpression of IGF-I and IGF-IR has also been documented in human breast carcinomas and correlated to malignant progression and prognosis in some, but not all, studies (14, 37). Of note, a genome-wide association study has identified GH-induced intracellular signaling pathways as the third most highly associated with breast cancer susceptibility among 421 pathways containing 3962 genes (38).

### Prostate cancer

Prostate cancer growth is mainly driven by androgen signaling, although the GH-IGF system might exert a permissive role in human prostate carcinogenesis (39). In contrast to breast cancer, exogenous GH seems to be responsible for more aggressive behavior than autocrine GH in prostate cancer cell lines (40). Nevertheless, both autocrine and exogenous GHs appear to enhance the metastatic potential of prostate cancer cells by stimulating cellular motility and invasiveness (41). Prostate-specific antigen, a marker of prostate cancer progression, is a protease that cleaves IGFBP-3 and acts as a comitogen with IGF-I (42). GH-induced IGF-I has been implicated in prostate cancer progression and activation of the androgen receptor (AR) in a ligand-independent manner (43, 44). Increased GH and GHR mRNA and protein coexpression have been documented in human prostate cancer, biopsy specimens, and in both androgen-sensitive and androgen-insensitive human prostate cancer cell lines (40, 45–47). Additionally, the PRLR is also expressed in human prostate cancer specimens and both GH and PRL have been linked to increased STAT5 activity, particularly in high histological-grade cancers (48, 49). STAT5 acts synergistically with AR signaling to promote growth and

metastatic behavior of the prostate tumor cells (50, 51). Activation of the AR, in turn, induces suppressor of cytokine signaling-2 that acts as a tumor suppressor by mediating the crosstalk with GH signaling pathways (52). GH can favor the expression of splice variants of the AR that are associated with resistance to androgen deprivation therapy. In aggressive, castration-resistant prostate cancer, GH expression following androgen deprivation therapy or AR inhibition has been linked to cancer progression by bypassing androgen growth requirements (44). Taken together, these findings support an endocrine/autocrine interaction between androgens and components of the GH signaling system, particularly in advanced stages of prostate cancer.

### Colorectal cancer

Most sporadic colorectal cancer (CRC) develops as a result of a multistep process involving numerous genetic mutations that promote a progressive transformation of the normal colonic epithelium to a benign adenoma, severe dysplasia, and, ultimately, an invasive and metastatic cancer. One of the earliest events in CRC carcinogenesis is the inactivation of *APC*, a “gatekeeper” gene that prevents accumulation of mutations and increased cellular proliferation. This is followed by activating mutations of the *KRAS* gene, loss of heterozygosity on 18q, and inactivation of the tumor-suppressor gene *p53*, events that are accompanied by mutations in other signaling pathways, as well as genomic, microsatellite, and epigenetic instability (53, 54). In a subset of CRC, deregulation of IGF-II signaling owing to loss of imprinting of the IGF-II gene has been proposed as a predictive risk factor and initiator of intestinal cancers (55, 56).

In normal colon, GH and GHR are not expressed in significant amounts. In contrast, GH expression is abundant in conditions predisposing to colon cancer and in stromal fibroblasts of the colonic carcinoma, but not within epithelial tumor cells (57, 58). GH expression in CRC is positively correlated with tumor size and lymph node metastasis (58). In turn, GHR is expressed by most colon epithelial cells, mainly intracellularly, with highest mRNA expression in the proliferating and differentiating zones of the colonic crypt (53, 57). Autocrine GH was shown to enhance cancer stem cell-like behavior, oncogenicity, and EMT functions and to promote xenograft growth and local invasion *in vivo* (58). Accordingly, IGFBP-3 inhibits colitis-induced carcinogenesis (59). It has recently been proposed that high GH levels (endocrine, as in acromegaly, or autocrine, as a result of colonic DNA damage or inflammation) suppress *p53*, *APC*, *PTEN*, and apoptosis, and they stimulate EMT, promoting a change in the intestinal mucosal field in favor of a neoplastic colon growth (57). If true, this model would provide a rationale for targeting GH signaling pathways as a potential treatment of CRC.

### Lung cancer

Eleven out of 64 single-nucleotide polymorphisms (SNPs) found to influence susceptibility for lung cancer in white individuals in a genome-wide association study were related to GH-IGF-I genes (60). In particular, a SNP located in the intracellular domain of the GHR resulting in an amino acid change at position 495 from proline to threonine (P495T) was strongly associated with lung cancer risk in white, Chinese, and African American women, in some cases in a redundant interaction with smoking and familial history of cancer (60–62). It was recently shown that P495T prolongs GH signaling by impairment of suppressor of cytokine signaling-2-mediated degradation in human lung cell lines, facilitating lung cancer progression (63). Moreover, the expression of GHRH-R and its splice variant SV1 is dramatically increased in established lung cancer cell lines and in lung malignant tissue (64, 65).

### Other malignancies

The exposure of papillary thyroid cancer cells to GHRH antagonists inhibits proliferation, increases apoptosis, and reduces the activity of matrix metalloproteinase-2, a marker of tumor invasion. *In vivo*, treatment with GHRH antagonist suppresses angiogenesis of engrafted thyroid tumors (66, 67). Moreover, IGF-I may promote progression of thyroid cancer from an occult to a clinically relevant stage by interacting with TSH and INS (68, 69).

In primary human melanoma, the SV1 splice variant of GHRH-R is expressed in high levels, and GHRH antagonists suppress growth of malignant melanoma both *in vitro* and *in vivo* (70, 71). GHR is also expressed in high levels in melanoma cells, and GH signaling pathways are known to drive melanoma progression and act as key mediators of the chemotherapeutic resistance in human melanoma (22, 72). The knockdown of the GHR in melanoma cell lines results in increased response to chemotherapy (73). Similarly, GHR silencing resulted in control of growth, migration, and invasion of pancreatic ductal adenocarcinoma (74). If this mechanism proves to be effective *in vivo*, it could implicate GHR inhibition as a mean of markedly improving the efficacy of antimelanoma drugs or assist in the development of novel anticancer compounds.

Autocrine expression of GH promotes cell proliferation, invasion, and cancer stem cell-like behavior of hepatocellular carcinoma cells through STAT3-dependent inhibition of CLAUDIN-1 expression, a tumor suppressor protein (75). In patients with hepatocellular carcinoma, tumor GH expression has been associated with tumor size and grade, poor relapse-free survival, and overall survival outcomes (76). IGF-RII might also function as a tumor suppressor in liver carcinogenesis, as loss of heterozygosity of the *IGF-RII* gene is found in human hepatocellular tumors accompanied by mutations in the remaining allele that result in formation of a truncated receptor (77).

Oncogenicity of the Janus kinase/STAT3 pathway has been observed in human endometrial cancer cells, where autocrine GH stimulates the EMT, migration, and invasion, effects that can be blocked by inhibition of STAT3 (78). In endometrial carcinoma, autocrine GH appears to be involved with resistance to ionizing radiation-based therapy, suggesting a role for functional antagonism of GH to enhance radiotherapy efficacy (79).

### Epidemiological Studies in the General Population

Serum IGF-I levels at the highest categories and IGFBP-3 levels in the lowest categories of the normal reference ranges have been associated with an increased risk for several prevalent cancers in the normal population. A summary of four meta-analyses found a positive association between IGF-I levels in the highest percentiles of the normal range with an increased risk of prostate, CRC, and breast cancer in both premenopausal and postmenopausal women (80). Serum IGF-I level was also an independent prognostic factor for the progression and survival of patients with hepatocellular carcinoma in a meta-analysis of 20 studies (81). In contrast, the risk of lung cancer was inversely correlated with IGFBP-3 concentrations, but in this case smoking was an important confounding factor, as IGFBP-3 concentrations are significantly reduced in smokers (82). In general, the influence of IGFBP-3 levels in cancer risk is weaker and usually disappears when results are adjusted for IGF-I levels (80).

In the last years, publications emerged from the EPIC cohort that consists of ~520,000 healthy volunteers, aged 35 to 69 years, recruited between 1992 and 2005 in 10 European countries. The EPIC studies confirmed the association of higher circulating IGF-I levels with increased risk of breast cancer, specifically receptor-positive tumors diagnosed in women at  $\geq 50$  years of age (83), and found positive associations with differentiated thyroid carcinoma (84), low-grade gliomas, and acoustic neuromas (85), but not with lymphoma (86), ovarian (87), hepatocellular (88), and pancreatic cancer (89). Positive associations between *IGF-I* and *IGFBP* gene polymorphisms with certain cancers have been reported in specific populations, but most large series failed to demonstrate a substantial impact of any single SNP in these genes on the clinical characteristics, therapeutic responses, or prognosis of patients with cancer (90–98).

### Cancer in GH Deficiency and Resistance

#### Animal models

Natural or experimentally induced repression of the GH-IGF signaling system is commonly associated with significant delayed or decreased occurrence of

spontaneous or chemical-induced neoplastic disease in various animal models, frequently accompanied by significant increases in lifespan (20, 99, 100). One of the most likely pathways contributing to tumor resistance in GH deficiency (GHD) and GH-resistant animals is the reduction in the mammalian target of rapamycin activity (101). Treatment with GH increases cancer rates in these animals, and in some cases, tumor regresses completely when treatment is interrupted (102, 103). GH and IGF-I deficiency genetically induced in adult life in rodents is also characterized by reduced prevalence of malignancies and increased longevity, but in these cases are associated with functional impairments and age-related degenerative diseases (104).

#### Congenital GHD in humans

Congenital GHD in humans is associated with lower incidences of cancer. In a survey of 53 patients with diagnosis of GHRH-R defect, isolated GHD, or IGF-I insensitivity, no case of cancer was observed, whereas 10 malignancies were identified in 88 relatives of the patients (105). Another similar investigation in 116 patients with congenital isolated GHD found one case of basal cell carcinoma in a short boy who was treated with GH and was also suffering from xeroderma pigmentosum, three malignancies in 79 patients with GHRH-R mutations (one patient previously treated with GH), and three malignancies in 113 patients with multiple congenital pituitary hormone deficiency (two previously treated with GH) (106). In this study, 62 cancers at various sites were reported in 883 relatives, a proportion significantly higher than in GHD patients. Of note, these findings indicate that the protection against cancer in human GHD is not absolute, as also confirmed by four cases of skin tumors with one cancer-related death in GH-naïve adult patients with GHD due to GHRH-R mutation (107). In this cohort, there was a fifth case of cancer in a woman who had intermittently received GH therapy from age 11 to 18 years and developed an ependymoma. Prolonged exposure to small amounts of endogenous or exogenous GH and IGF-I may explain the rare cases of cancer observed in this and other GHD kindred (108).

#### Hypopituitarism

Life expectancy is reduced in acquired hypopituitarism due to vascular diseases, and in a pioneer Swedish study, only seven patients died of cancer, a number significantly lower than expected (109). Untreated GHD was suggested as a potential factor to explain both the increased mortality from vascular disease and the protection against cancer in adults with hypopituitarism. Subsequently, small series found no differences in mortality rates due to cancer (110–112), whereas in three of four larger retrospective studies with more than a thousand patients and controls, the risk of having cancer or dying from cancer was

increased in patients with hypopituitarism not receiving GH (113–116). Surprisingly, CRC (which is usually associated with GH excess in acromegaly) was the predominant malignancy and the main cause of death in one study (115). These divergent results are explained by a variety of confounding factors, unrelated to GHD, including differences in sampling size and study design, prevalence of specific cancer types in the control populations, underlying pituitary disease, surgery, radiation, associated morbidities, and inadequate pituitary hormone replacement (117, 118).

### GH resistance in humans (Laron syndrome)

Congenital IGF-I deficiency caused by homozygous mutations in the GHR or GH-induced intracellular signaling molecules (Laron syndrome) acts as a protecting factor against cancer development. Patients with Laron syndrome often die of aging-unrelated causes, such as accidents or alcohol abuse (20, 105, 106). In one study, none of 169 Laron patients had cancer, in contrast with 41 cancers in 250 members of their families (106). Accordingly, not a single case of cancer was reported in another series of 230 patients with Laron syndrome (105). In a cohort of 99 individuals with Laron syndrome living in Loja, Ecuador, only one case of a nonlethal malignancy was identified, whereas the incidence of cancer was 17% in controls from the same region (119). Ecuadorian dwarfs with Laron syndrome had increased INS sensitivity in comparison with their unaffected relatives, and cells treated with their serum exhibited reduced DNA breaks and increased apoptosis (119).

## Cancer Associated With GH-IGF Excess

### Transgenic animals

Transgenic (Tg) GH mice exhibit features of acromegaly and increased incidence of spontaneous and carcinogen-induced hepatocellular carcinoma (120, 121). These effects are likely due to an IGF-I-independent action of GH on hepatocytes, as Tg IGF-I mice do not exhibit such liver abnormalities, but instead have increased bowel length with highly proliferative colonic crypt cells and decreased apoptosis (122–124). The effects of postnatal IGF-II overexpression vary according to the attained circulating levels and the tissue examined, suggesting a more important local than systemic IGF-II action (14, 125, 126). Tg IGF-IR mice show aberrant development of salivary, pancreatic, and mammary adenocarcinomas as early as 6 weeks of age, characterized by a more invasive and metastatic phenotype (127–129). In contrast, IGF-IIR overexpression results in antiproliferative effects in mammary and prostate cancer cell lines and inhibition of tumor formation *in vivo* (14, 130, 131). Systemic and tissue-specific overexpression of all IGFBPs in Tg animals and in experiments using gene transfer and upregulation

is usually associated with reduction or attenuation of tumor growth and vascularity at different tissues, but in some circumstances, IGFBPs may stimulate cell growth and migration either directly or by enhancing IGF-I effects (14, 132–137).

### Acromegaly

In the pioneering study by Mustacchi and Shimkin (138) in 1957, 13 cancers were detected in 223 acromegaly patients followed during 14 years, with not a single case of CRC or thyroid cancer, leading the authors to conclude that “the material analyzed in this report has not disclosed the presence of a definite influence of the pituitary gland on the initiation of cancer in man. If this stimulus exists, it does not seem to be a very potent one.” Since then, studies examining the risk of cancer in patients with acromegaly have continuously led to inconsistent and controversial findings. From the mechanistic point of view, this could be explained by individual factors affecting the balance between GH-stimulated signals for cell growth (IGFs) and cell death (IGFBP-3) that are simultaneously present in acromegaly. From the epidemiological point of view, there are numerous limitations in determining the incidence of a high prevalent and heterogeneous disease, such as cancer, in patients with a rare disease, such as acromegaly (139).

As shown in Table 1, a mean cancer incidence of 9.6% was found in a review of 23 series published between 1957 and 2018, with large variation in cases of CRC and thyroid cancer reported in different settings (138, 140–161). The standardized incidence ratio (SIR), available in 14 series, was increased in five (141, 142, 149, 157, 159), marginally increased in one (146), not increased in four (marginally lower in one) (138, 151, 155, 156), increased only in women in three (144, 154, 160), and increased only in men in one (148). In large series where cancer rates in patients were compared with those in the general population, SIR was increased in the cohorts from the United States (159), Sweden/Denmark (141, 146), Finland (149), and Italy (160), not increased in the United Kingdom (155) and France (151), and marginally lower in Germany (156). Recently, the Liège Acromegaly Survey Database reported on only 64 cancers in 3173 acromegaly patients followed in 10 different countries, showing that the rate of overall or specific cancers was not markedly elevated in relationship to the general populations (162). Thus, data collected during the last 60 years indicate that the effect of prolonged GH excess in carcinogenesis in acromegaly is, at best, marginally increased and its clinical impact is modest (139). Nevertheless, recommendations for cancer screening, particularly CRC and thyroid cancer, in asymptomatic patients have divided opinions among the experts, a topic that we and others recently revisited (139, 163–165). In the most recent consensus statement, it was recommended that cancer screening in acromegaly should follow the same protocols as for the

---

*“...the effect of prolonged GH excess in carcinogenesis in acromegaly is, at best, marginally increased...”*

---

**Table 1. Cancer Incidence and Cases of Colorectal (CRC) and Thyroid Malignancies in Acromegaly Studies**

| Study (Reference)                     | Year | Country            | Patients (N) | Cancers (N) | Prevalence (%) | Overall SIR          | CRC (N) | Thyroid (N) |
|---------------------------------------|------|--------------------|--------------|-------------|----------------|----------------------|---------|-------------|
| Mustacchi and Shinkin (138)           | 1957 | United States      | 223          | 13          | 5.8            | Not increased        | 0       | 0           |
| Baldys-Waligórska <i>et al.</i> (140) | 2010 | Poland             | 101          | 12          | 11.9           | NA                   | 2       | 3           |
| Baris <i>et al.</i> (141)             | 2002 | Sweden and Denmark | 1634         | 177         | 10.8           | Increased            | 36      | 3           |
| Barzilay <i>et al.</i> (142)          | 1991 | United States      | 87           | 7           | 8              | Increased            | 1       | 2           |
| Cheng <i>et al.</i> (143)             | 2015 | Canada             | 408          | 55          | 13.5           | NA                   | NA      | NA          |
| Cheung and Boyages (144)              | 1997 | Australia          | 50           | 7           | 14             | Increased in women   | 1       | 0           |
| Dagdelen <i>et al.</i> (145)          | 2014 | Turkey             | 160          | 34          | 21.3           | NA                   | 3       | 17          |
| Dal <i>et al.</i> (146)               | 2018 | Denmark            | 529          | 81          | 15.3           | Marginally increased | 10      | 1           |
| Gullu <i>et al.</i> (147)             | 2010 | Turkey             | 105          | 16          | 15.2           | NA                   | 2       | 5           |
| Higuchi <i>et al.</i> (148)           | 2000 | Japan              | 44           | 5           | 11.4           | Increased in men     | 1       | 2           |
| Kauppinen-Mäkelin <i>et al.</i> (149) | 2010 | Finland            | 331          | 48          | 14.5           | Increased            | 6       | 6           |
| Kurimoto <i>et al.</i> (150)          | 2008 | Japan              | 140          | 22          | 15.7           | NA                   | 10      | 5           |
| Maione <i>et al.</i> (151)            | 2017 | France             | 999          | 94          | 9.4            | Not increased        | 15      | 18          |
| Mercado <i>et al.</i> (152)           | 2014 | Mexico             | 442          | 21          | 4.8            | NA                   | 1       | 7           |
| Mestron <i>et al.</i> (153)           | 2004 | Spain              | 1219         | 90          | 7.4            | NA                   | 15      | 2           |
| Nabarro (154)                         | 1987 | United Kingdom     | 256          | 26          | 10.2           | Increased in women   | 1       | 1           |
| Orme <i>et al.</i> (155)              | 1998 | United Kingdom     | 1239         | 79          | 6.4            | Not increased        | 16      | 1           |
| Petroff <i>et al.</i> (156)           | 2015 | Germany            | 446          | 46          | 10.3           | Marginally decreased | 4       | 3           |
| Popovic <i>et al.</i> (157)           | 1998 | Serbia             | 220          | 23          | 10.5           | Increased            | 2       | 3           |
| Ritchie <i>et al.</i> (158)           | 1990 | United Kingdom     | 131          | 15          | 11.4           | NA                   | 4       | 0           |
| Ron <i>et al.</i> (159)               | 1991 | United States      | 1041         | 89          | 8.5            | Increased            | 13      | 1           |
| Terzolo <i>et al.</i> (160)           | 2017 | Italy              | 1512         | 124         | 8.2            | Increased in women   | 20      | 13          |
| Wolinski <i>et al.</i> (161)          | 2017 | Poland             | 200          | 27          | 13.5           | NA                   | 4       | 14          |
| Total                                 |      |                    | 11,517       | 1,111       | 9.6            |                      | 167     | 107         |

Abbreviations: NA, not available; SIR, standardized incidence ratio.

general population (166). Of note, factors unrelated to GH status affect cancer estimates in acromegaly, such as variable cancer prevalence in the control population among different countries, genetic/epigenetic events in acromegaly, surveillance bias, presence of comorbidities, and disease management (139). The proportion of acromegaly patients who are successfully treated has progressively increased in recent years owing to greater access to multimodal treatment. Currently, many patients with acromegaly have normal life expectancy and, not surprisingly, age has been associated with an increased cancer risk by multivariate analysis in two recent multicenter studies from Canada (143) and Italy (160).

Increased mortality in active acromegaly has traditionally been related to cardiovascular, respiratory, and metabolic complications (118, 155, 167–169).

Nevertheless, a recent 20-year follow-up study is a good example to illustrate the shift on the causes of deaths in acromegaly; whereas 44% of deaths were due to cardiovascular events and 28% were due to cancer in the first decade, the numbers changed to 23% cardiovascular and 35% cancer during the last decade, contrasting with the unchanged proportion of cancer deaths over time in the control group (170). This finding has frequently been accompanied by a decrease and even normalization of mortality rates in acromegaly, with cancer becoming the main cause of death in several studies (151, 152, 171–177) (Table 2). In a meta-analysis of observational studies published before ( $n = 17$ ) and after 2008 ( $n = 9$ ), we found that the standardized mortality ratio (SMR) did not differ from that of the normal population in the last decade, as a result of an

**Table 2. Mortality in Acromegaly in the Last Decade Determined by Treatment Regimens, Disease Activity, and Cancer Deaths**

| Study (Reference)                             | N    | No. of Deaths | Mean Age of Death (y) | Only Cx + Rxt SMR (95% CI) | Include SRL SMR (95% CI) | Controlled SMR (95% CI) | Uncontrolled SMR (95% CI) | Cancer Deaths (%) | Cancer SMR (95% CI) |
|-----------------------------------------------|------|---------------|-----------------------|----------------------------|--------------------------|-------------------------|---------------------------|-------------------|---------------------|
| Maione <i>et al.</i> , 2017 (151)             | 999  | 41            | 62.8                  |                            | 1.05 (0.77–1.43)         |                         |                           | 34                | Main cause of death |
| Mercado <i>et al.</i> , 2014 (152)            | 442  | 22            | 58.6                  |                            | 0.76 (0.50–1.16)         | 0.46 (0.21–0.96)        | 0.94 (0.57–1.55)          | 27.2              | Main cause of death |
| Arosio <i>et al.</i> , 2012 (172)             | 1512 | 61            | 64                    |                            | 1.15 (0.90–1.47)         | 0.59 (0.37–0.94)        | 1.93 (1.33–2.78)          | 36                | Main cause of death |
| Bogazzi <i>et al.</i> , 2013 (173)            | 438  | 20            | 68.8                  |                            | 0.70 (0.45–1.09)         |                         |                           | 30                | —                   |
| Colao <i>et al.</i> , 2014 <sup>a</sup> (174) | 220  | 7             | 61.3                  |                            | 0.66 (0.27–1.36)         |                         |                           | 42.8              | Main cause of death |
| Colao <i>et al.</i> , 2014 <sup>b</sup> (174) | 407  | 71            | 61.9                  | 2.01 (1.59–2.54)           |                          | 1.25 (0.79–1.95)        | 2.57 (1.96–3.36)          | 16.9              | 1.43 (0.81–2.52)    |
| Exposito <i>et al.</i> , 2018 (175)           | 1089 | 232           | NA                    | 2.93 (2.56–3.35)           | 0.98 (0.25–3.94)         |                         |                           | 21.1              | 1.76 (1.33–2.33)    |
| Sherlock <i>et al.</i> , 2009 (176)           | 501  | 162           | 67                    | 1.69 (1.45–1.97)           |                          |                         |                           | 22.2              | 1.21 (0.87–1.68)    |
| Varadhan <i>et al.</i> , 2016 (177)           | 167  | 67            | 71                    |                            | 1.00 (0.57–1.75)         |                         |                           | NA                | —                   |
| Wu <i>et al.</i> , 2010 (178)                 | 142  | 18            | NA                    | 1.93 (1.22–3.05)           |                          | 0.46 (0.06–3.28)        | 3.11 (1.68–5.79)          | 28                | —                   |
| Total                                         | 5917 | 701           | 64.4                  | 2.11 (1.54–2.91)           | 0.98 (0.83–1.15)         | 0.70 (0.41–1.22)        | 1.95 (1.25–3.04)          | 28.7              | 1.48 (1.15–1.90)    |

Abbreviations: Cx, surgery; NA, not available; Rxt, radiotherapy; SMR, standardized mortality ratio; SRL, somatostatin receptor ligand.

<sup>a</sup>Italian cohort.

<sup>b</sup>Bulgarian cohort.

increased proportion of acromegaly patients attaining disease control with multimodal treatment. In parallel, we have confirmed that age-related cancer deaths increased and have become one of the leading causes of mortality in acromegaly (178). Of note, many cancer deaths in recent studies were due to malignancies not commonly related to GH excess in acromegaly (143, 151, 152, 160, 170).

## Cancer in Individuals Treated With GH

### Pediatric population

During the 1980s and 1990s, an association was found between the occurrence of leukemia during or shortly after GH treatment in children with GHD (179–181). Subsequent studies excluding patients with known risk factors for leukemia revealed a cancer incidence comparable to the general population, which was confirmed by postmarketing surveillance studies with large number of GH recipients with no risk factors for malignancy (182–186). Such history linking GH therapy and development of leukemia is illustrative of the numerous pitfalls and concerns in determining the risk of cancer in GH-treated individuals, especially those with known risk factors for neoplasia. Recurrence rates and incidence of *de novo* malignancy were not increased in studies from single or multiple centers where time of GH exposure ranged from a few months to >10 years (187–192). A recent review encompassing safety data from GH registries from different pharmaceutical companies between 1988 and

2016 showed no evidence of increased risk of new malignancy, leukemia, nonleukemic extracranial tumors, or recurrence of intracranial malignancy in GH-treated children with no other risk factors, but it demonstrated an increased risk of a second neoplasm in patients irradiated for a central nervous system (CNS) tumor (193). In a population-based Israeli study, cancer incidence or mortality was not increased in low-risk patients treated with GH during childhood, whereas both cancer mortality and incidence were higher than expected in GH recipients with prior risk factors for malignancies (194). Two meta-analyses involving patients with intracranial tumors (195, 196) and one in pediatric craniopharyngioma (197) found no association of GH therapy with increased risk of tumor recurrence. In contrast, a meta-analysis of 12 long-term studies found that both the overall cancer incidence and relative risk for second neoplasms were significantly increased with GH treatment during childhood, although no increased in mortality rate was observed (198).

More recently, the Safety and Appropriateness of Growth Hormone Treatments in Europe (SAGhE) cohort study, including Belgium, Netherlands, Sweden, Switzerland, United Kingdom, France, Germany, and Italy, was set up to provide long-term safety information on GH treatment independently of pharmaceutical companies. The SAGhE cohort consisted of 24,232 patients born before 1991 to 1995 and treated any time up to a date during 2007 to 2009, most commonly with isolated growth failure (53%), Turner syndrome (13%), and GHD linked to neoplasia (12%)

(199). A preliminary report from the France arm showed no increased mortality due to malignancies in general, but a fivefold increase in deaths due to bone tumors (3 observed vs 0.6 expected) in adults treated with GH during infancy owing to isolated GHD, idiopathic short stature (ISS), and small for gestation age (SGA), conditions classified as low risk for long-term mortality (200). This report was followed by a preliminary data analysis from the Belgium, Netherlands, and Sweden arms of the SAGhE consisting of 46,556 person-years of observation, with no report of death due to cancer (201). Recently, the analysis of the full

SAGhE cohort including 396,344 person-years revealed 251 cancer deaths, and both cancer mortality and incidence significantly increased for several types of malignancies in GH-treated subjects (202). However, the overall cancer risk and mortality were not increased in patients with isolated GHD, ISS, and SGA and no GH dose effect in cancer development was observed in these groups of patients, in which only 21 deaths were reported. Thus, the raised cancer incidence and mortality were largely consequent to tumors in patients given GH after cancer treatment or due to other etiologies, where 230 deaths were reported. In the group of cancer survivors, there were increased SIRs for CRC and bone, soft tissue, ovary, kidney, CNS, and thyroid cancers, melanoma, and leukemia, and increased SMRs for tongue, mouth, pharynx, pancreas, bone, soft tissue, corpus uteri, ovary, kidney, CNS, and thyroid cancers, as well as non-Hodgkin lymphoma and leukemia. In the cancer survivors group, cancer mortality increased significantly with increasing daily GH dose. In patients treated with GH due to other noncancer etiologies different than isolated GHD, ISS and SGA, the incidence of bone and bladder cancer was also increased. Hodgkin lymphoma incidence showed a significant increase with longer follow-up for patients without previous cancer, whereas mortality due to CNS tumors decreased in patients whose underlying diagnosis was cancer (202).

Clearly, the underlying condition to which GH therapy is indicated plays a role in the cancer risk in children. A group of conditions known as "RASopathies," which include Noonan syndrome (NS), neurofibromatosis type 1, NS with multiple lentigines, cardio-facio-cutaneous syndrome, Costello syndrome, capillary malformation–arteriovenous malformation syndrome, and Legius syndrome, has an incidence of ~1 in 1000 live births and an inherited increased risk for malignancies (203–207). Patients with NS have a 3.5- to 8.1-fold increased risk of cancer, particularly acute leukemia and myeloproliferative disorders (208, 209). This finding reinforces the extreme concern related to safety of GH treatment in this group of children (210, 211). The same applies for short children with chromosomal breakage syndromes or DNA-repair disorders, represented by Fanconi anemia (212), ataxia telangiectasia (213), Bloom syndrome (214), Down syndrome (215), and other dysmorphic disorders (216–220). The overlapping clinical features among genetic syndromes and late appearance of their hallmark features make the diagnosis challenging in many cases (221). This was illustrated by the report of a young boy with clinical diagnosis of NS, but no identification of a pathogenic mutation, in whom neurofibromatosis type 1 was genetically confirmed later in the follow-up (222). From another report, two short children had the diagnosis of Bloom syndrome years after GH treatment was started, despite extensive

**Table 3. Medical Conditions Associated With Short Stature and High Risk of Malignancy**

| Medical Condition (References)                                          | Special Remarks                                                                                                                                                 |
|-------------------------------------------------------------------------|-----------------------------------------------------------------------------------------------------------------------------------------------------------------|
| Dysmorphic syndromes                                                    | Overlapping characteristics between syndromes and late appearance of hallmark features might prevent diagnosis, especially when genetic tests are not available |
| RASopathies (203–205)                                                   |                                                                                                                                                                 |
| NS (210, 211)                                                           |                                                                                                                                                                 |
| Neurofibromatosis type 1 (205)                                          |                                                                                                                                                                 |
| NS with multiple lentigines (203, 204)                                  |                                                                                                                                                                 |
| Cardio-facio-cutaneous syndrome (204)                                   |                                                                                                                                                                 |
| Costello syndrome (204)                                                 |                                                                                                                                                                 |
| DNA-repair disorders                                                    |                                                                                                                                                                 |
| Fanconi anemia (212)                                                    |                                                                                                                                                                 |
| Ataxia telangiectasia (213)                                             |                                                                                                                                                                 |
| Bloom syndrome (214)                                                    |                                                                                                                                                                 |
| Others                                                                  | Risk of a second malignancy, which may decrease with time                                                                                                       |
| Down syndrome (215)                                                     |                                                                                                                                                                 |
| Xeroderma pigmentosum, Cockayne syndrome, and trichothiodystrophy (216) |                                                                                                                                                                 |
| Kabuki syndrome (217)                                                   |                                                                                                                                                                 |
| Mulibrey syndrome (218)                                                 |                                                                                                                                                                 |
| Dubowitz syndrome (219)                                                 |                                                                                                                                                                 |
| Nijmegen breakage syndrome (220)                                        |                                                                                                                                                                 |
| Pediatric cancer survivors                                              |                                                                                                                                                                 |
| Medulloblastoma (226)                                                   |                                                                                                                                                                 |
| Leukemia, retinoblastoma, Hodgkin lymphoma (227)                        |                                                                                                                                                                 |
|                                                                         | IGF-I levels must be kept in age-appropriate range during GH treatment                                                                                          |

and careful diagnostic workup (223). One case was a girl born SGA who had a diagnosis of a non-Hodgkin lymphoma at 14.8 years of age and died 1 year later due to sepsis. The other was a boy with initial diagnosis of Silver-Russell syndrome treated with GH during 5 years before appearance of a photosensitive facial rash that led to the diagnosis of Bloom syndrome.

A recent document from the Pediatric Endocrine Society Drug and Therapeutics Committee made three statements: (i) GH therapy can be safely administered in children without known risk factors for malignancy; (ii) in children with conditions predisposing to cancer, GH use should be defined on an individual basis, with appropriate surveillance for malignancies if therapy is initiated; and (iii) in childhood cancer survivors who are in remission, GH therapy can be used with the understanding that it may increase their risk for second neoplasms (224). Another recent statement from the Growth Hormone Research Society recommends that in high-risk patients, initiation of GH therapy should be discussed with patients and their families (225). In our view, the benefits and risks of GH therapy in cancer survivors need to be carefully scrutinized and proper surveillance should be undertaken during therapy, maintaining IGF-I concentrations always in the age-appropriate range (226, 227). When a dysmorphic syndrome is suspected or confirmed, GH therapy should not be initiated [Table 3 (203–205, 210–220, 226, 227)]. In all other indications, GH therapy is safe and cancer surveillance beyond standard practice is not necessary.

### Adult population

GH therapy in adults is indicated for patients who were diagnosed in childhood with isolated or combined GHD that persists in adult life and for those with acquired GHD in adulthood. In the latter case, GHD is secondary to pituitary or perisellar tumors and/or their treatment in approximately two-third of cases, and it is generally associated with other pituitary hormone deficiencies. Some patients harboring these tumors may present an inherent elevated risk for malignancies (228, 229).

In the Hypopituitary Control and Complications Study, the overall SIR of primary and secondary cancer was not increased in patients receiving GH as adults, except in the subgroups of patients <35 years of age and those with childhood-onset GHD (230). In the Pfizer International Metabolic Database Study, no increase in cancer mortality was observed and the risk of second malignancies was increased only in cancer survivors who had childhood-onset GHD, but not in those with adult-onset GHD (231). Another report from the Swedish arm of Pfizer International Metabolic Database showed a significant increase of SMR associated with late appearance of brain cancer, which was considered to be related to previous radiotherapy

and not with GH therapy (232). In the Dutch National Registry of GH-treated adult patients, SMR due to cancer was not increased (233).

Recently, a Web-based search identified nine studies addressing the risk of *de novo* neoplasia or recurrence/progression of underlying hypothalamic–pituitary tumors in a cohort representing 41,000 adult patient-years on GH therapy (234). There was no evidence from the reviewed studies, some of them having >10 years of follow-up, that GH therapy increases the risk of primary cancer, secondary neoplasia, or recurrence of previous tumors. This observation was confirmed in a meta-analysis of 15 studies published between 1995 and 2015 involving 46,148 patients (235). Surprisingly, a reduced risk of cancer in GHD adults treated with GH was observed in another meta-analysis of two retrospective and seven prospective studies totaling 11,191 participants followed during 2.3 to 14.5 years (236). Taken together, data collected during >30 years of GH replacement in GHD adults have reassured the safety of this therapy, with caution recommended only in cancer

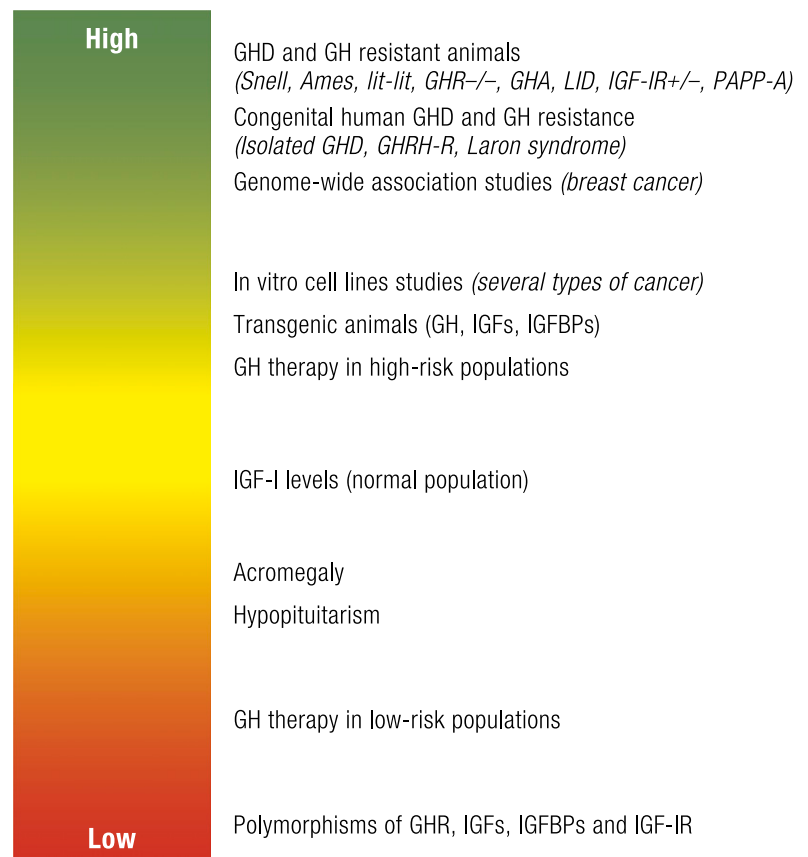

**Figure 2.** Level of evidence linking GH and cancer. The bar colors in the proposal model represent levels of evidence for a direct association of cancer with GH: red (low), yellow (intermediate), green (high). Strength was graded from the red to green level according to the study design: expert opinion, case reports and case series, case-control studies, cohort studies, randomized controlled trials, meta-analysis, and systematic reviews. Quality was graded from the red to green level considering the number of independent publications supporting a relationship with cancer in the same vs in the opposite direction.

survivors with childhood-onset GHD and patients subjected to radiotherapy for brain tumors.

### GHRH–GH–IGF-I Axis as a Target for Cancer Therapy

In recent years, various classes of GHRH antagonists have been synthesized and tested in preclinical studies as anticancer therapy owing to their ability to suppress the GH–IGF-I axis and mainly due to their direct autocrine/paracrine effects on the tumors (27, 237). Nevertheless, no clinical data exist to determine the efficacy and safety of GHRH antagonists in human cancer owing to problems with their bioavailability, short half-life, rapid renal clearance, and lack of *in vivo* stability due to proteolytic degradation (237). Accordingly, despite some promising results in preclinical studies of GHR-targeted agents, such as pegvisomant (a GHR antagonist approved for the treatment of acromegaly), their usefulness in treating human cancer still remains to be proved (22, 26, 73, 100, 238–240).

Several anticancer therapeutic interventions targeting IGF signaling pathways have been tested in preclinical studies and in clinical trials, which have been summarized in several reviews in the past years (16–18, 26, 100, 238–244). These interventions are mainly based on receptor-targeting agents or drugs that reduce ligand bioactivity. Monoclonal antibodies against IGF-IR promote receptor internalization and degradation, whereas monoclonal antibodies that bind both IGFs prevent them from binding and activating their receptors. Tyrosine kinase inhibitors decrease IGF-IR activity by competing for the ATP binding site on the receptor's kinase domain and blocking signal transduction (17). Small interfering RNAs may induce potent IGF-IR gene silencing and inhibition of IGF signaling, thereby enhancing radiosensitivity and chemosensitivity (16). Despite good performance of most agents in preclinical and early clinical studies, phase 2 and 3 trials have been highly disappointed owing to both efficacy and safety issues (16, 17, 245–247). These poor results have been explained by

several factors, such as the expression and pathological importance of IGF, IGF-BPs, and IGF/INS-R isoforms in the different tumors, potency of inhibition, disease stage, toxicity, concomitant therapies, and compensatory mechanisms by other signaling pathways. Also, the homology between IGFI-R and INS-R results in undesirable side effects, such as hyperinsulinemia and hyperglycemia, during therapy with inhibitors of IGFI-R signaling (16, 17, 241). Different strategies have been tested to overcome these limitations, but with no clinical application up to now (248–251).

### Future Directions and Conclusions

Despite substantial advances to unravel the mechanisms linking GH with cancer development, many unanswered questions persist and attempts to extrapolate the findings from experimental or epidemiological studies to clinical care often lead to misconceptions and misinterpretations. The quality and the strength of evidence vary substantially among the studies and divergent results are common (Fig. 2). Thus, the more a finding is replicated and confirmed, the more valuable it becomes. Following this rule, there is robust evidence that both animals and humans with congenital GHD or GH resistance exhibit protection against several types of cancer, and these models are among the strongest evidence for a role of GH in carcinogenesis. In the opposite direction, GH excess as a cause of cancer in acromegaly has divided opinions for years and, as yet, a direct causal relationship has not been undoubtedly demonstrated. The risk of cancer related to GH therapy has been exhaustively scrutinized and, at present, available data on GH therapy in children without underlying risk factors for cancer, and in GHD adults, are reassuring. However, carefully monitoring is still advised, especially if treatment is initiated in high-risk groups, and more long-term studies on GH-exposed individuals, even years after treatment has been interrupted, are desirable. Finally, the discouraging results with anticancer therapies targeting components of the GH-IGF system reported to date clearly warrant the need for further investigation.

### References

- Lewis UJ. Growth hormone. What is it and what does it do? *Trends Endocrinol Metab.* 1992;**3**(4):117–121.
- Ranke MB, Wit JM. Growth hormone—past, present and future. *Nat Rev Endocrinol.* 2018;**14**(5):285–300.
- Harvey S, Martínez-Moreno CG, Luna M, Arámburo C. Autocrine/paracrine roles of extrapituitary growth hormone and prolactin in health and disease: an overview. *Gen Comp Endocrinol.* 2015;**220**:103–111.
- Brooks AJ, Dai W, O'Mara ML, Abankwa D, Chhabra Y, Pelekanos RA, Gardon O, Tunny KA, Blucher KM, Morton CJ, Parker MW, Sierceki E, Gambin Y, Gomez GA, Alexandrov K, Wilson IA, Doxastakis M, Mark AE, Waters MJ. Mechanism of activation of protein kinase JAK2 by the growth hormone receptor. *Science.* 2014;**344**(6185):1249783.
- de Vos AM, Ullrich M, Kossiakoff AA. Human growth hormone and extracellular domain of its receptor: crystal structure of the complex. *Science.* 1992;**255**(5042):306–312.
- Waters MJ. The growth hormone receptor. *Growth Horm IGF Res.* 2016;**28**:6–10.
- Bergan-Roller HE, Sheridan MA. The growth hormone signaling system: insights into coordinating the anabolic and catabolic actions of growth hormone. *Gen Comp Endocrinol.* 2018;**258**:119–133.
- Zhu T, Goh EL, Graichen R, Ling L, Lobie PE. Signal transduction via the growth hormone receptor. *Cell Signal.* 2001;**13**(9):599–616.
- Perry JK, Liu DX, Wu ZS, Zhu T, Lobie PE. Growth hormone and cancer: an update on progress. *Curr Opin Endocrinol Diabetes Obes.* 2013;**20**(4):307–313.
- Steyn FJ, Tolle V, Chen C, Epelbaum J. Neuroendocrine regulation of growth hormone secretion. *Compr Physiol.* 2016;**6**(2):687–735.

11. Vázquez-Borrego MC, Gahete MD, Martínez-Fuentes AJ, Fuentes-Fayos AC, Castaño JP, Kineman RD, Luque RM. Multiple signaling pathways convey central and peripheral signals to regulate pituitary function: lessons from human and non-human primate models. *Mol Cell Endocrinol*. 2018;**463**:4–22.
12. Bergman D, Halje M, Nordin M, Engström W. Insulin-like growth factor 2 in development and disease: a mini-review. *Gerontology*. 2013;**59**(3): 240–249.
13. Milman S, Huffman DM, Barzilai N. The somatotropic axis in human aging: framework for the current state of knowledge and future research. *Cell Metab*. 2016;**23**(6):980–989.
14. Samani AA, Yakar S, LeRoith D, Brodt P. The role of the IGF system in cancer growth and metastasis: overview and recent insights. *Endocr Rev*. 2007;**28**(1):20–47.
15. Annunziata M, Granata R, Ghigo E. The IGF system. *Acta Diabetol*. 2011;**48**(1):1–9.
16. Brahmakhatry VP, Prasanna C, Atreya HS. Insulin-like growth factor system in cancer: novel targeted therapies. *BioMed Res Int*. 2015;**2015**:538019.
17. Bowers LW, Rossi EL, O'Flanagan CH, deGraffenried LA, Hursting SD. The role of the insulin/IGF system in cancer: lessons learned from clinical trials and the energy balance-cancer link. *Front Endocrinol (Lausanne)*. 2015;**6**:77.
18. Werooha SJ, Haluska P. The insulin-like growth factor system in cancer. *Endocrinol Metab Clin North Am*. 2012;**41**(2):335–350, vi.
19. Le Roith D, Bondy C, Yakar S, Liu JL, Butler A. The somatomedin hypothesis: 2001. *Endocr Rev*. 2001;**22**(1):53–74.
20. Junnila RK, List EO, Berryman DE, Murrey JW, Kopchick JJ. The GH/IGF-1 axis in ageing and longevity. *Nat Rev Endocrinol*. 2013;**9**(6):366–376.
21. Podlasky A, Valcarcel-Ares MN, Yancey K, Podlaskaya V, Nagykalai E, Gautam T, Miller RA, Sonntag WE, Csiszar A, Ungvari Z. The GH/IGF-1 axis in a critical period early in life determines cellular DNA repair capacity by altering transcriptional regulation of DNA repair-related genes: implications for the developmental origins of cancer. *Geroscience*. 2017;**39**(2):147–160.
22. Basu R, Wu S, Kopchick JJ. Targeting growth hormone receptor in human melanoma cells attenuates tumor progression and epithelial mesenchymal transition via suppression of multiple oncogenic pathways. *Oncotarget*. 2017;**8**(13): 21579–21598.
23. Boguszewski CL, Boguszewski MC, Kopchick JJ. Growth hormone, insulin-like growth factor system and carcinogenesis. *Endokrynol Pol*. 2016;**67**(4): 414–426.
24. Brittain AL, Basu R, Qian Y, Kopchick JJ. Growth hormone and the epithelial-to-mesenchymal transition. *J Clin Endocrinol Metab*. 2017;**102**(10): 3662–3673.
25. Brooks AJ, Waters MJ. The growth hormone receptor: mechanism of activation and clinical implications. *Nat Rev Endocrinol*. 2010;**6**(9):515–525.
26. Perry JK, Wu ZS, Mertani HC, Zhu T, Lobie PE. Tumour-derived human growth hormone as a therapeutic target in oncology. *Trends Endocrinol Metab*. 2017;**28**(8):587–596.
27. Schally AV, Varga JL, Engel JB. Antagonists of growth-hormone-releasing hormone: an emerging new therapy for cancer. *Nat Clin Pract Endocrinol Metab*. 2008;**4**(1):33–43.
28. Kleinberg DL, Wood TL, Furth PA, Lee AV. Growth hormone and insulin-like growth factor-I in the transition from normal mammary development to preneoplastic mammary lesions. *Endocr Rev*. 2009;**30**(1):51–74.
29. Subramani R, Nandy SB, Pedroza DA, Lakshmanaswamy R. Role of growth hormone in breast cancer. *Endocrinology*. 2017;**158**(6):1543–1555.
30. Felice DL, El-Shennawy L, Zhao S, Lantvit DL, Shen Q, Unterman TG, Swanson SM, Frasor J. Growth hormone potentiates 17 $\beta$ -estradiol-dependent breast cancer cell proliferation independently of IGF-I receptor signaling. *Endocrinology*. 2013;**154**(9): 3219–3227.
31. Baskari S, Govatati S, Madhuri V, Nallabelli N, K PM, Naik S, Poornachandar, Balka S, Tamanam RR, Devi VR. Influence of autocrine growth hormone on NF- $\kappa$ B activation leading to epithelial-mesenchymal transition of mammary carcinoma. *Tumour Biol*. 2017;**39**(10):1010428317719121.
32. Basu R, Qian Y, Kopchick JJ. mechanisms in endocrinology: lessons from growth hormone receptor gene-disrupted mice: are there benefits of endocrine defects? *Eur J Endocrinol*. 2018;**178**(5): R155–R181.
33. Chen YJ, Zhang X, Wu ZS, Wang JJ, Lau AY, Zhu T, Lobie PE. Autocrine human growth hormone stimulates the tumor initiating capacity and metastasis of estrogen receptor-negative mammary carcinoma cells. *Cancer Lett*. 2015;**365**(2):182–189.
34. van den Eijnden MJ, Strous GJ. Autocrine growth hormone: effects on growth hormone receptor trafficking and signaling. *Mol Endocrinol*. 2007;**21**(11):2832–2846.
35. Gebre-Medhin M, Kindblom LG, Wennbo H, Törnell J, Meis-Kindblom JM. Growth hormone receptor is expressed in human breast cancer. *Am J Pathol*. 2001;**158**(4):1217–1222.
36. Wu ZS, Yang K, Wan Y, Qian PX, Perry JK, Chiesa J, Mertani HC, Zhu T, Lobie PE. Tumor expression of human growth hormone and human prolactin predict a worse survival outcome in patients with mammary or endometrial carcinoma. *J Clin Endocrinol Metab*. 2011;**96**(10):E1619–E1629.
37. Shin SJ, Gong G, Lee HJ, Kang J, Bae YK, Lee A, Cho EY, Lee JS, Suh KS, Lee DW, Jung WH. Positive expression of insulin-like growth factor-1 receptor is associated with a positive hormone receptor status and a favorable prognosis in breast cancer. *J Breast Cancer*. 2014;**17**(2):113–120.
38. Menashe I, Maeder D, Garcia-Closas M, Figueroa JD, Bhattacharjee S, Rotunno M, Kraft P, Hunter DJ, Chanock SJ, Rosenberg PS, Chatterjee N. Pathway analysis of breast cancer genome-wide association study highlights three pathways and one canonical signaling cascade. *Cancer Res*. 2010;**70**(11): 4453–4459.
39. Zhu ML, Kyprianou N. Androgen receptor and growth factor signaling cross-talk in prostate cancer cells. *Endocr Relat Cancer*. 2008;**15**(4):841–849.
40. Nakonechnaya AO, Jefferson HS, Chen X, Shewchuk BM. Differential effects of exogenous and autocrine growth hormone on LNCaP prostate cancer cell proliferation and survival. *J Cell Biochem*. 2013;**114**(6):1322–1335.
41. Nakonechnaya AO, Shewchuk BM. Growth hormone enhances LNCaP prostate cancer cell motility. *Endocr Res*. 2015;**40**(2):97–105.
42. Cohen P, Graves HC, Peehl DM, Kamarei M, Giudice LC, Rosenfeld RG. Prostate-specific antigen (PSA) is an insulin-like growth factor binding protein-3 protease found in seminal plasma. *J Clin Endocrinol Metab*. 1992;**75**(4):1046–1053.
43. Bidosee M, Karry R, Weiss-Messer E, Barkey RJ. Growth hormone affects gene expression and proliferation in human prostate cancer cells. *Int J Androl*. 2011;**34**(2):124–137.
44. Recouvreux MV, Wu JB, Gao AC, Zonis S, Chesnokova V, Bhowmick N, Chung LW, Melmed S. Androgen receptor regulation of local growth hormone in prostate cancer cells. *Endocrinology*. 2017;**158**(7):2255–2268.
45. Chopin LK, Veveris-Lowe TL, Philipps AF, Herington AC. Co-expression of GH and GHR isoforms in prostate cancer cell lines. *Growth Horm IGF Res*. 2002;**12**(2):126–136.
46. Slater MD, Murphy CR. Co-expression of interleukin-6 and human growth hormone in apparently normal prostate biopsies that ultimately progress to prostate cancer using low pH, high temperature antigen retrieval. *J Mol Histol*. 2006;**37**(1–2):37–41.
47. Weiss-Messer E, Merom O, Adi A, Karry R, Bidosee M, Ber R, Kaploun A, Stein A, Barkey RJ. Growth hormone (GH) receptors in prostate cancer: gene expression in human tissues and cell lines and characterization, GH signaling and androgen receptor regulation in LNCaP cells. *Mol Cell Endocrinol*. 2004;**220**(1–2):109–123.
48. Dagvadorj A, Collins S, Jomain JB, Abdulghani J, Karras J, Zellweger T, Li H, Nurmi M, Alanen K, Mirtti T, Visakorpi T, Bubendorf L, Goffin V, Nevalainen MT. Autocrine prolactin promotes prostate cancer cell growth via Janus kinase-2-signal transducer and activator of transcription-5a/b signaling pathway. *Endocrinology*. 2007;**148**(7): 3089–3101.
49. Li H, Zhang Y, Glass A, Zellweger T, Gehan E, Bubendorf L, Gelmann EP, Nevalainen MT. Activation of signal transducer and activator of transcription-5 in prostate cancer predicts early recurrence. *Clin Cancer Res*. 2005;**11**(16):5863–5868.
50. Gu L, Vogiatzi P, Puh R, Dagvadorj A, Lutz J, Ryder A, Addya S, Fortina P, Cooper C, Leiby B, Dasgupta A, Hyslop T, Bubendorf L, Alanen K, Mirtti T, Nevalainen MT. Stat5 promotes metastatic behavior of human prostate cancer cells in vitro and in vivo. *Endocr Relat Cancer*. 2010;**17**(2):481–493.
51. Tan SH, Dagvadorj A, Shen F, Gu L, Liao Z, Abdulghani J, Zhang Y, Gelmann EP, Zellweger T, Culig Z, Visakorpi T, Bubendorf L, Kirken RA, Karras J, Nevalainen MT. Transcription factor Stat5 synergizes with androgen receptor in prostate cancer cells. *Cancer Res*. 2008;**68**(1):236–248.
52. Iglesias-Gato D, Chuan YC, Wikström P, Augsten S, Jiang N, Niu Y, Seipel A, Danneman D, Vermeij M, Fernandez-Perez L, Jenster G, Egevad L, Norstedt G, Flores-Morales A. SOCS2 mediates the cross talk between androgen and growth hormone signaling in prostate cancer. *Carcinogenesis*. 2014;**35**(1):24–33.
53. Bustin SA, Jenkins PJ. The growth hormone–insulin-like growth factor-I axis and colorectal cancer. *Trends Mol Med*. 2001;**7**(10):447–454.
54. Zoratto F, Rossi L, Verrico M, Papa A, Basso E, Zullo A, Tomao L, Romiti A, Lo Russo G, Tomao S. Focus on genetic and epigenetic events of colorectal cancer pathogenesis: implications for molecular diagnosis. *Tumour Biol*. 2014;**35**(7):6195–6206.
55. Belharazem D, Magdeburg J, Berton AK, Beissbarth L, Sauer C, Sticht C, Marx A, Hofheinz R, Post S, Kienle P, Ströbel P. Carcinoma of the colon and rectum with deregulation of insulin-like growth factor 2 signaling: clinical and molecular implications. *J Gastroenterol*. 2016;**51**(10):971–984.
56. Cui H, Cruz-Correa M, Giardiello FM, Hutcheon DF, Kafonek DR, Brandenburg S, Wu Y, He X, Powe NR, Feinberg AP. Loss of IGF2 imprinting: a potential marker of colorectal cancer risk. *Science*. 2003;**299**(5613):1753–1755.

57. Chesnokova V, Zonis S, Zhou C, Recouvreux MV, Ben-Shlomo A, Araki T, Barrett R, Workman M, Wawrowsky K, Ljubimov VA, Uhart M, Melmed S. Growth hormone is permissive for neoplastic colon growth [published correction appears in *Proc Natl Acad Sci USA*. 2016;113(35):E5251]. *Proc Natl Acad Sci USA*. 2016;113(23):E3250–E3259.
58. Wang JJ, Chong QY, Sun XB, You ML, Pandey V, Chen YJ, Zhuang QS, Liu DX, Ma L, Wu ZS, Zhu T, Lobie PE. Autocrine hGH stimulates oncogenicity, epithelial-mesenchymal transition and cancer stem cell-like behavior in human colorectal carcinoma. *Oncotarget*. 2017;8(61):103900–103918.
59. Belizon A, Balik E, Kirman I, Remotti H, Ciau N, Jain S, Whelan RL. Insulin-like growth factor binding protein-3 inhibits colitis-induced carcinogenesis. *Dis Colon Rectum*. 2007;50(9):1377–1383.
60. Rudd MF, Webb EL, Matakidou A, Sellick GS, Williams RD, Bridle H, Eisen T, Houlston RS, GELCAPS Consortium. Variants in the GH-IGF axis confer susceptibility to lung cancer. *Genome Res*. 2006;16(6):693–701.
61. Cao G, Lu H, Feng J, Shu J, Zheng D, Hou Y. Lung cancer risk associated with Thr495Pro polymorphism of GHR in Chinese population. *Jpn J Clin Oncol*. 2008;38(4):308–316.
62. Van Dyke AL, Cote ML, Wenzlaff AS, Abrams J, Land S, Iyer P, Schwartz AG. Chromosome 5p region SNPs are associated with risk of NSCLC among women. *J Cancer Epidemiol*. 2009;2009:242151.
63. Chhabra Y, Wong HY, Nikolajsen LF, Steinocher H, Papadopoulos A, Tunny KA, Meunier FA, Smith AG, Kragelund BB, Brooks AJ, Waters MJ. A growth hormone receptor SNP promotes lung cancer by impairment of SOCS2-mediated degradation. *Oncogene*. 2018;37(4):489–501.
64. Havt A, Schally AV, Halmos G, Varga JL, Toller GL, Horvath JE, Szepeshazi K, Köster F, Kovitz K, Groot K, Zarandi M, Kanashiro CA. The expression of the pituitary growth hormone-releasing hormone receptor and its splice variants in normal and neoplastic human tissues. *Proc Natl Acad Sci USA*. 2005;102(48):17424–17429.
65. Wang H, Zhang X, Vidaurre I, Cai R, Sha W, Schally AV. Inhibition of experimental small-cell and non-small-cell lung cancers by novel antagonists of growth hormone-releasing hormone. *Int J Cancer*. 2018;142(11):2394–2404.
66. Catanuto P, Tashiro J, Rick FG, Sanchez P, Solorzano CC, Glassberg MK, Block NL, Lew JL, Elliot SJ, Schally AV. Expression of receptors for pituitary-type growth hormone-releasing hormone (pGHRH-R) in human papillary thyroid cancer cells: effects of GHRH antagonists on matrix metalloproteinase-2. *Horm Cancer*. 2015;6(2–3):100–106.
67. Pópulo H, Nunes B, Sampaio C, Batista R, Pinto MT, Gaspar TB, Miranda-Alves L, Cai RZ, Zhang XY, Schally AV, Sobrinho-Simões M, Soares P. Inhibitory effects of antagonists of growth hormone-releasing hormone (GHRH) in thyroid cancer. *Horm Cancer*. 2017;8(5–6):314–324.
68. Ciampolillo A, De Tullio C, Giorgino F. The IGF-1/IGF-I receptor pathway: implications in the pathophysiology of thyroid cancer. *Curr Med Chem*. 2005;12(24):2881–2891.
69. Malaguarnera R, Frasca F, Garozzo A, Giani F, Pandini G, Vella V, Vigneri R, Belfiore A. Insulin receptor isoforms and insulin-like growth factor receptor in human follicular cell precursors from papillary thyroid cancer and normal thyroid. *J Clin Endocrinol Metab*. 2011;96(3):766–774.
70. Chatzistamou I, Volakaki AA, Schally AV, Kiaris H, Kittas C. Expression of growth hormone-releasing hormone receptor splice variant 1 in primary human melanomas. *Regul Pept*. 2008;147(1–3):33–36.
71. Szalontay L, Schally AV, Popovics P, Vidaurre I, Krishan A, Zarandi M, Cai RZ, Klukovits A, Block NL, Rick FG. Novel GHRH antagonists suppress the growth of human malignant melanoma by restoring nuclear p27 function. *Cell Cycle*. 2014;13(17):2790–2797.
72. Sustarsic EG, Junnila RK, Kopchick JJ. Human metastatic melanoma cell lines express high levels of growth hormone receptor and respond to GH treatment. *Biochem Biophys Res Commun*. 2013;441(1):144–150.
73. Basu R, Baumgaertel N, Wu S, Kopchick JJ. Growth hormone receptor knockdown sensitizes human melanoma cells to chemotherapy by attenuating expression of ABC drug efflux pumps. *Horm Cancer*. 2017;8(3):143–156.
74. Subramani R, Lopez-Valdez R, Salcido A, Boopalan T, Arumugam A, Nandy S, Lakshmanaswamy R. Growth hormone receptor inhibition decreases the growth and metastasis of pancreatic ductal adenocarcinoma. *Exp Mol Med*. 2014;46(10):e117.
75. Chen YJ, You ML, Chong QY, Pandey V, Zhuang QS, Liu DX, Ma L, Zhu T, Lobie PE. Autocrine human growth hormone promotes invasive and cancer stem cell-like behavior of hepatocellular carcinoma cells by STAT3 dependent inhibition of CLAUDIN-1 expression. *Int J Mol Sci*. 2017;18(6):E1274.
76. Kong X, Wu W, Yuan Y, Pandey V, Wu Z, Lu X, Zhang W, Chen Y, Wu M, Zhang M, Li G, Tan S, Qian P, Perry JK, Lobie PE, Zhu T. Human growth hormone and human prolactin function as autocrine/paracrine promoters of progression of hepatocellular carcinoma. *Oncotarget*. 2016;7(20):29465–29479.
77. De Souza AT, Hankins GR, Washington MK, Orton TC, Jirtle RL. *M6P/IGF2R* gene is mutated in human hepatocellular carcinomas with loss of heterozygosity. *Nat Genet*. 1995;11(4):447–449.
78. Tang JZ, Kong XJ, Banerjee A, Muniraj N, Pandey V, Steiner M, Perry JK, Zhu T, Liu DX, Lobie PE. STAT3α is oncogenic for endometrial carcinoma cells and mediates the oncogenic effects of autocrine human growth hormone. *Endocrinology*. 2010;151(9):4133–4145.
79. Bougen NM, Steiner M, Pertziger M, Banerjee A, Brunet-Dunand SE, Zhu T, Lobie PE, Perry JK. Autocrine human GH promotes radioresistance in mammary and endometrial carcinoma cells. *Endocr Relat Cancer*. 2012;19(5):625–644.
80. Clayton PE, Banerjee I, Murray PG, Renahan AG. Growth hormone, the insulin-like growth factor axis, insulin and cancer risk. *Nat Rev Endocrinol*. 2011;7(1):11–24.
81. Wang J, Li YC, Deng M, Jiang HY, Guo LH, Zhou WJ, Ruan B. Serum insulin-like growth factor-1 and its binding protein 3 as prognostic factors for the incidence, progression, and outcome of hepatocellular carcinoma: a systematic review and meta-analysis. *Oncotarget*. 2017;8(46):81098–81108.
82. Chen B, Liu S, Xu W, Wang X, Zhao W, Wu J. IGF-I and IGFBP-3 and the risk of lung cancer: a meta-analysis based on nested case-control studies. *J Exp Clin Cancer Res*. 2009;28(1):89.
83. Kaaks R, Johnson T, Tikk K, Sookthai D, Tjønneland A, Roswall N, Overvad K, Clavel-Chapelon F, Boutron-Ruault MC, Dossus L, Rinaldi S, Romieu I, Boeing H, Schütze M, Trichopoulou A, Lagiou P, Trichopoulos D, Palli D, Grioni S, Tumino R, Sacerdote C, Panico S, Buckland G, Argüelles M, Sánchez MJ, Amiano P, Chirlaque MD, Ardanaz E, Bueno-de-Mesquita HB, van Gils CH, Peeters PH, Andersson A, Sund M, Weiderpass E, Gram IT, Lund E, Khaw KT, Wareham N, Key TJ, Travis RC, Merritt MA, Gunter MJ, Riboli E, Lukanova A. Insulin-like growth factor I and risk of breast cancer by age and hormone receptor status—a prospective study within the EPIC cohort. *Int J Cancer*. 2014;134(11):2683–2690.
84. Schmidt JA, Allen NE, Almquist M, Franceschi S, Rinaldi S, Tipper SJ, Tsilidis KK, Weiderpass E, Overvad K, Tjønneland A, Boutron-Ruault MC, Dossus L, Mesrine S, Kaaks R, Lukanova A, Boeing H, Lagiou P, Trichopoulos D, Trichopoulou A, Palli D, Krogh V, Panico S, Tumino R, Zanetti R, Bueno-de-Mesquita HB, Peeters PH, Lund E, Menéndez V, Agudo A, Sánchez MJ, Chirlaque MD, Ardanaz E, Larrañaga N, Hennings J, Sandström M, Khaw KT, Wareham N, Romieu I, Gunter MJ, Riboli E, Key TJ, Travis RC. Insulin-like growth factor-I and risk of differentiated thyroid carcinoma in the European prospective investigation into cancer and nutrition. *Cancer Epidemiol Biomarkers Prev*. 2014;23(6):976–985.
85. Rohrmann S, Linseisen J, Becker S, Allen N, Schlehofer B, Overvad K, Olsen A, Tjønneland A, Melin BS, Lund E, Vineis P, Grioni S, Tumino R, Palli D, Mattiello A, Bonet C, Chirlaque MD, Sánchez MJ, Rodríguez L, Dorronsoro M, Ardanaz E, Lagiou P, Trichopoulou A, Trichopoulos D, Dossus L, Grote VA, Boeing H, Aleksandrova K, Bueno-de-Mesquita HB, van Duijnhoven FJ, Peeters PH, Khaw KT, Wareham NJ, Key TJ, Rinaldi S, Romieu I, Gallo V, Michaud DS, Riboli E, Kaaks R. Concentrations of IGF-I and IGFBP-3 and brain tumor risk in the European Prospective Investigation into Cancer and Nutrition. *Cancer Epidemiol Biomarkers Prev*. 2011;20(12):2174–2182.
86. Perez-Cornago A, Appleby PN, Tipper S, Key TJ, Allen NE, Nieters A, Vermeulen R, Roulland S, Casabonne D, Kaaks R, Fortner RT, Boeing H, Trichopoulou A, La Vecchia C, Klinaki E, Hansen L, Tjønneland A, Bonnet F, Fagherazzi G, Boutron-Ruault MC, Pala V, Masala G, Sacerdote C, Peeters PH, Bueno-de-Mesquita HB, Weiderpass E, Dorronsoro M, Quirós JR, Barricarte A, Gavrila D, Agudo A, Borgquist S, Rosendahl AH, Melin B, Wareham N, Khaw KT, Gunter M, Riboli E, Vineis P, Travis RC. Prediagnostic circulating concentrations of plasma insulin-like growth factor-I and risk of lymphoma in the European Prospective Investigation into Cancer and Nutrition. *Int J Cancer*. 2017;140(5):1111–1118.
87. Ose J, Fortner RT, Schock H, Peeters PH, Onland-Moret NC, Bueno-de-Mesquita HB, Weiderpass E, Gram IT, Overvad K, Tjønneland A, Dossus L, Fournier A, Baglietto L, Trichopoulou A, Benetou V, Trichopoulos D, Boeing H, Masala G, Krogh V, Mattiello A, Tumino R, Popovic M, Obón-Satcáncana M, Larrañaga N, Ardanaz E, Sánchez MJ, Menéndez V, Chirlaque MD, Travis RC, Khaw KT, Brändstedt J, Idahl A, Lundin E, Rinaldi S, Kuhn E, Romieu I, Gunter MJ, Merritt MA, Riboli E, Kaaks R. Insulin-like growth factor I and risk of epithelial invasive ovarian cancer by tumour characteristics: results from the EPIC cohort. *Br J Cancer*. 2015;112(1):162–166.
88. Lukanova A, Becker S, Hüsing A, Schock H, Fedirko V, Trepo E, Trichopoulou A, Bamia C, Lagiou P, Benetou V, Trichopoulos D, Nöthlings U, Tjønneland A, Overvad K, Dossus L, Teucher B, Boeing H, Aleksandrova K, Palli D, Pala V, Panico S, Tumino R, Ricceri F, Bueno-de-Mesquita HB, Siersema PD, Peeters PH, Quirós JR, Duell EJ, Molina-Montes E, Chirlaque MD, Gurrea AB, Dorronsoro M, Lindkvist B, Johansen D, Werner M, Sund M, Khaw KT, Wareham N, Key TJ, Travis RC, Rinaldi S, Romieu I, Gunter MJ, Riboli E, Jenab M, Kaaks R. Prediagnostic

- plasma testosterone, sex hormone-binding globulin, IGF-I and hepatocellular carcinoma: etiological factors or risk markers? *Int J Cancer*. 2014;**134**(1): 164–173.
89. Rohrmann S, Grote VA, Becker S, Rinaldi S, Tjønneland A, Roswall N, Grønbaek H, Overvad K, Boutron-Ruault MC, Clavel-Chapelon F, Racine A, Teucher B, Boeing H, Drogan D, Dilis V, Laggiou P, Trichopoulou A, Palli D, Tagliaiue G, Tumino R, Vineis P, Mattiello A, Rodríguez L, Duell EJ, Molina-Montes E, Dorronsoro M, Huerta JM, Ardanaz E, Jeurink S, Peeters PH, Lindkvist B, Johansen D, Sund M, Ye W, Khaw KT, Wareham NJ, Allen NE, Crowe FL, Fedirko V, Jenab M, Michaud DS, Norat T, Riboli E, Bueno-de-Mesquita HB, Kaaks R. Concentrations of IGF-I and IGFBP-3 and pancreatic cancer risk in the European Prospective Investigation into Cancer and Nutrition. *Br J Cancer*. 2012;**106**(5):1004–1010.
  90. Canzian F, McKay JD, Cleveland RJ, Dossus L, Biessy C, Boillot C, Rinaldi S, Llewellyn M, Chajès V, Clavel-Chapelon F, Têhard B, Chang-Claude J, Linseisen J, Lahmann PH, Pischon T, Trichopoulos D, Trichopoulou A, Zilis D, Palli D, Tumino R, Vineis P, Berrino F, Bueno-de-Mesquita HB, van Gils CH, Peeters PH, Pera G, Barricarte A, Chirlaque MD, Quirós JR, Larrañaga N, Martínez-García C, Allen NE, Key TJ, Bingham SA, Khaw KT, Slimani N, Norat T, Riboli E, Kaaks R. Genetic variation in the growth hormone synthesis pathway in relation to circulating insulin-like growth factor-I, insulin-like growth factor binding protein-3, and breast cancer risk: results from the European Prospective Investigation into Cancer and Nutrition Study. *Cancer Epidemiol Biomarkers Prev*. 2005;**14**(10): 2316–2325.
  91. Guo Q, Shen F, Zhang C, Yang X, Zhu HC, Zhang Q, Shen ST, Sun XC, Dai SB. IGF-I CA19 repeat polymorphisms and cancer risk: a meta-analysis. *Int J Clin Exp Med*. 2015;**8**(11):20596–20602.
  92. Jung SY, Ho G, Rohan T, Strickler H, Bea J, Papp J, Sobel E, Zhang ZF, Crandall C. Interaction of insulin-like growth factor-I and insulin resistance-related genetic variants with lifestyle factors on postmenopausal breast cancer risk. *Breast Cancer Res Treat*. 2017;**164**(2):475–495.
  93. Patel AV, Cheng I, Canzian F, Le Marchand L, Thun MJ, Berg CD, Buring J, Calle EE, Chanock S, Clavel-Chapelon F, Cox DG, Dorronsoro M, Dossus L, Haiman CA, Hankinson SE, Henderson BE, Hoover R, Hunter DJ, Kaaks R, Kolonel LN, Kraft P, Linseisen J, Lund E, Manjer J, McCarty C, Peeters PH, Pike MC, Pollak M, Riboli E, Stram DO, Tjønneland A, Travis RC, Trichopoulos D, Tumino R, Yeager M, Ziegler RG, Feigelson HS; Breast and Prostate Cancer Cohort Consortium. IGF-1, IGFBP-1, and IGFBP-3 polymorphisms predict circulating IGF levels but not breast cancer risk: findings from the Breast and Prostate Cancer Cohort Consortium (BPC3). *PLoS One*. 2008;**3**(7):e2578.
  94. Quan H, Tang H, Fang L, Bi J, Liu Y, Li H. IGF1(CA)19 and IGFBP-3-202A/C gene polymorphism and cancer risk: a meta-analysis. *Cell Biochem Biophys*. 2014;**69**(1):169–178.
  95. Ren Z, Cai Q, Shu XO, Cai H, Cheng JR, Wen WQ, Gao YT, Zheng W. Genetic polymorphisms in the human growth hormone-1 gene (GH1) and the risk of breast carcinoma. *Cancer*. 2004;**101**(2):251–257.
  96. Shi J, Tong JH, Cai S. GH1 T1663A polymorphism and cancer risk: a meta-analysis of case-control studies. *Tumour Biol*. 2014;**35**(5):4529–4538.
  97. Simons CC, Schouten LJ, Godschalk RW, van Engeland M, van den Brandt PA, van Schooten FJ, Weijenberg MP. Energy restriction at young age, genetic variants in the insulin-like growth factor pathway and colorectal cancer risk in the Netherlands Cohort Study. *Int J Cancer*. 2017;**140**(2): 272–284.
  98. Wagner K, Hemminki K, Försti A. The GH1/IGF-1 axis polymorphisms and their impact on breast cancer development. *Breast Cancer Res Treat*. 2007;**104**(3):233–248.
  99. Conover CA. Role of PAPP-A in aging and age-related disease. *Exp Gerontol*. 2013;**48**(7):612–613.
  100. Kopchick JJ, List EO, Kelder B, Gosney ES, Berryman DE. Evaluation of growth hormone (GH) action in mice: discovery of GH receptor antagonists and clinical indications. *Mol Cell Endocrinol*. 2014;**386**(1–2):34–45.
  101. Anisimov VN, Bartke A. The key role of growth hormone–insulin–IGF-1 signaling in aging and cancer. *Crit Rev Oncol Hematol*. 2013;**87**(3):201–223.
  102. Kuramoto K, Tahara S, Sasaki T, Matsumoto S, Kaneko T, Kondo H, Yanabe M, Takagi S, Shinkai T. Spontaneous dwarf rat: a novel model for aging research. *Geriatr Gerontol Int*. 2010;**10**(1):94–101.
  103. Shen Q, Lantvit DD, Lin Q, Li Y, Christov K, Wang Z, Unterman TG, Mehta RG, Swanson SM. Advanced rat mammary cancers are growth hormone dependent. *Endocrinology*. 2007;**148**(10):4536–4544.
  104. Sonntag WE, Carter CS, Ikeno Y, Ekenstedt K, Carlson CS, Loeser RF, Chakraborty S, Lee S, Bennett C, Ingram R, Moore T, Ramsey M. Adult-onset growth hormone and insulin-like growth factor I deficiency reduces neoplastic disease, modifies age-related pathology, and increases life span. *Endocrinology*. 2005;**146**(7):2920–2932.
  105. Shevah O, Laron Z. Patients with congenital deficiency of IGF-I seem protected from the development of malignancies: a preliminary report. *Growth Horm IGF Res*. 2007;**17**(1):54–57.
  106. Steuerman R, Shevah O, Laron Z. Congenital IGF1 deficiency tends to confer protection against postnatal development of malignancies. *Eur J Endocrinol*. 2011;**164**(4):485–489.
  107. Marinho CG, Mermejo LM, Salvatori R, Assirati JA, Oliveira CRP, Santos EG, Leal ÁCGB, Barros-Oliveira CS, Damascena NP, Lima CA, Farias CT, Moreira AC, Aguiar-Oliveira MH. Occurrence of neoplasms in individuals with congenital, severe GH deficiency from the Itabaianinha kindred. *Growth Horm IGF Res*. 2018;**41**:71–74.
  108. Aguiar-Oliveira MH, Souza AHO, Oliveira CRP, Campos VC, Oliveira-Neto LA, Salvatori R. Mechanisms in endocrinology: the multiple facets of GHRH/GH/IGF-I axis: lessons from lifetime, untreated, isolated GH deficiency due to a GHRH receptor gene mutation. *Eur J Endocrinol*. 2017;**177**(2):R85–R97.
  109. Rosén T, Bengtsson BA. Premature mortality due to cardiovascular disease in hypopituitarism. *Lancet*. 1990;**336**(8710):285–288.
  110. Bates AS, Bullivant B, Sheppard MC, Stewart PM. Life expectancy following surgery for pituitary tumours. *Clin Endocrinol (Oxf)*. 1999;**50**(3):315–319.
  111. Bülow B, Hagmar L, Mikoczy Z, Nordström CH, Erfurth EM. Increased cerebrovascular mortality in patients with hypopituitarism. *Clin Endocrinol (Oxf)*. 1997;**46**(1):75–81.
  112. Kaji H, Chihara K. Direct causes of death in Japanese patients with hypopituitarism as analyzed from a nation-wide autopsy database. *Eur J Endocrinol*. 2004;**150**(2):149–152.
  113. Nilsson B, Gustavsson-Kadaka E, Bengtsson BA, Jonsson B. Pituitary adenomas in Sweden between 1958 and 1991: incidence, survival, and mortality. *J Clin Endocrinol Metab*. 2000;**85**(4):1420–1425.
  114. Stochholm K, Gravholt CH, Laursen T, Laurberg P, Andersen M, Kristensen LØ, Feldt-Rasmussen U, Christiansen JS, Frydenberg M, Green A. Mortality and GH deficiency: a nationwide study. *Eur J Endocrinol*. 2007;**157**(1):9–18.
  115. Svensson J, Bengtsson BA, Rosén T, Odén A, Johannsson G. Malignant disease and cardiovascular morbidity in hypopituitary adults with or without growth hormone replacement therapy. *J Clin Endocrinol Metab*. 2004;**89**(7):3306–3312.
  116. Tomlinson JW, Holden N, Hills RK, Wheatley K, Clayton RN, Bates AS, Sheppard MC, Stewart PM; West Midlands Prospective Hypopituitary Study Group. Association between premature mortality and hypopituitarism. *Lancet*. 2001;**357**(9254):425–431.
  117. Pekic S, Popovic V. GH therapy and cancer risk in hypopituitarism: what we know from human studies. *Eur J Endocrinol*. 2013;**169**(5):R89–R97.
  118. Sherlock M, Ayuk J, Tomlinson JW, Toogood AA, Aragon-Alonso A, Sheppard MC, Bates AS, Stewart PM. Mortality in patients with pituitary disease. *Endocr Rev*. 2010;**31**(3):301–342.
  119. Guevara-Aguirre J, Balasubramanian P, Guevara-Aguirre M, Wei M, Madia F, Cheng CW, Hwang D, Martin-Montalvo A, Saavedra J, Ingles S, de Cabo R, Cohen P, Longo VD. Growth hormone receptor deficiency is associated with a major reduction in pro-aging signaling, cancer, and diabetes in humans. *Sci Transl Med*. 2011;**3**(70):70ra13.
  120. Bartke A, Chandrasekar V, Bailey B, Zaczek D, Turyn D. Consequences of growth hormone (GH) overexpression and GH resistance. *Neuropeptides*. 2002;**36**(2–3):201–208.
  121. Snibson KJ, Bhathal PS, Adams TE. Overexpressed growth hormone (GH) synergistically promotes carcinogen-initiated liver tumour growth by promoting cellular proliferation in emerging hepatocellular neoplasms in female and male GH-transgenic mice. *Liver*. 2001;**21**(2):149–158.
  122. Bartke A. Can growth hormone (GH) accelerate aging? Evidence from GH-transgenic mice. *Neuroendocrinology*. 2003;**78**(4):210–216.
  123. Melmed S. Acromegaly and cancer: not a problem? *J Clin Endocrinol Metab*. 2001;**86**(7):2929–2934.
  124. Miquet JG, Freund T, Martinez CS, González L, Díaz ME, Micucci GP, Zotta E, Boparai RK, Bartke A, Turyn D, Sotelo AL. Hepatocellular alterations and dysregulation of oncogenic pathways in the liver of transgenic mice overexpressing growth hormone [published correction appears in *Cell Cycle*. 2015; **14**(15):2537]. *Cell Cycle*. 2013;**12**(7):1042–1057.
  125. Bates P, Fisher R, Ward A, Richardson L, Hill DJ, Graham CF. Mammary cancer in transgenic mice expressing insulin-like growth factor II (IGF-II). *Br J Cancer*. 1995;**72**(5):1189–1193.
  126. Wolf E, Hoefflich A, Lahm H. What is the function of IGF-II in postnatal life? Answers from transgenic mouse models. *Growth Horm IGF Res*. 1998;**8**(3): 185–193.
  127. Carboni JM, Lee AV, Hadsell DL, Rowley BR, Lee FY, Bol DK, Camuso AE, Gottardis M, Greer AF, Ho CP, Hurlburt W, Li A, Saulnier M, Velaparthi U, Wang C, Wen ML, Westhouse RA, Wittman M, Zimmermann K, Rupnow BA, Wong TW. Tumor development by transgenic expression of a constitutively active insulin-like growth factor I receptor. *Cancer Res*. 2005;**65**(9):3781–3787.
  128. Jones RA, Moorehead RA. The impact of transgenic IGF-IR overexpression on mammary development and tumorigenesis. *J Mammary Gland Biol Neoplasia*. 2008;**13**(4):407–413.
  129. Lopez T, Hanahan D. Elevated levels of IGF-1 receptor convey invasive and metastatic capability in a mouse model of pancreatic islet tumorigenesis. *Cancer Cell*. 2002;**1**(4):339–353.

130. Li J, Sahagian GG. Demonstration of tumor suppression by mannose 6-phosphate/insulin-like growth factor 2 receptor. *Oncogene*. 2004;**23**(58): 9359–9368.
131. O'Gorman DB, Weiss J, Hettiaratchi A, Firth SM, Scott CD. Insulin-like growth factor-II/mannose 6-phosphate receptor overexpression reduces growth of choriocarcinoma cells in vitro and in vivo. *Endocrinology*. 2002;**143**(11):4287–4294.
132. Bach LA. IGFBP-6 five years on; not so 'forgotten'? *Growth Horm IGF Res*. 2005;**15**(3):185–192.
133. Durai R, Davies M, Yang W, Yang SY, Seifalian A, Goldspink G, Winslet M. Biology of insulin-like growth factor binding protein-4 and its role in cancer (review). *Int J Oncol*. 2006;**28**(6):1317–1325.
134. Johnson MA, Firth SM. IGFBP-3: a cell fate pivot in cancer and disease. *Growth Horm IGF Res*. 2014;**24**(5):164–173.
135. Lu S, Archer MC. Insulin-like growth factor binding protein-1 over-expression in transgenic mice inhibits hepatic preneoplasia. *Mol Carcinog*. 2003;**36**(3):142–146.
136. Rho SB, Dong SM, Kang S, Seo SS, Yoo CW, Lee DO, Woo JS, Park SY. Insulin-like growth factor-binding protein-5 (IGFBP-5) acts as a tumor suppressor by inhibiting angiogenesis. *Carcinogenesis*. 2008;**29**(11): 2106–2111.
137. Russo VC, Azar WJ, Yau SW, Sabin MA, Werther GA. IGFBP-2: the dark horse in metabolism and cancer. *Cytokine Growth Factor Rev*. 2015;**26**(3):329–346.
138. Mustacchi P, Shimkin MB. Occurrence of cancer in acromegaly and in hypopituitarism. *Cancer*. 1957;**10**(1):100–104.
139. Boguszewski CL, Ayuk J. Management of endocrine disease: acromegaly and cancer: an old debate revisited. *Eur J Endocrinol*. 2016;**175**(4):R147–R156.
140. Baldys-Waligórska A, Krzewska A, Gołkowski F, Sokołowski G, Hubalewska-Dydejczyk A. The prevalence of benign and malignant neoplasms in acromegalic patients. *Endokrynol Pol*. 2010;**61**(1): 29–34.
141. Baris D, Gridley G, Ron E, Weiderpass E, Mellemkjaer L, Ekblom A, Olsen JH, Baron JA, Fraumeni JF Jr. Acromegaly and cancer risk: a cohort study in Sweden and Denmark. *Cancer Causes Control*. 2002;**13**(5):395–400.
142. Barzilay J, Heatley GJ, Cushing GW. Benign and malignant tumors in patients with acromegaly. *Arch Intern Med*. 1991;**151**(8):1629–1632.
143. Cheng S, Gomez K, Serri O, Chik C, Ezzat S. The role of diabetes in acromegaly associated neoplasia. *PLoS One*. 2015;**10**(5):e0127276.
144. Cheung NW, Boyages SC. Increased incidence of neoplasia in females with acromegaly. *Clin Endocrinol (Oxf)*. 1997;**47**(3):323–327.
145. Dagdelen S, Cinar N, Erbas T. Increased thyroid cancer risk in acromegaly. *Pituitary*. 2014;**17**(4): 299–306.
146. Dal J, Leisner MZ, Hermansen K, Farkas DK, Bengtsen M, Kistorp C, Nielsen EH, Andersen M, Feldt-Rasmussen U, Dekkers OM, Sørensen HT, Jørgensen JOL. Cancer incidence in patients with acromegaly: a cohort study and meta-analysis of the literature. *J Clin Endocrinol Metab*. 2018;**103**(6): 2182–2188.
147. Gullu BE, Celik O, Gazioglu N, Kadioglu P. Thyroid cancer is the most common cancer associated with acromegaly. *Pituitary*. 2010;**13**(3):242–248.
148. Higuchi Y, Saeki N, Iuchi T, Uchino Y, Tatsuno I, Uchida D, Tanaka T, Noguchi Y, Nakamura S, Yasuda T, Yamaura A, Sunami K, Oka Y, Uozumi A. Incidence of malignant tumors in patients with acromegaly. *Endocr J*. 2000;**47**(Suppl):S57–S60.
149. Kauppinen-Mäkelin R, Sane T, Välimäki MJ, Markkanen H, Niskanen L, Ebeling T, Jaatinen P, Juonala M, Pukkala E, Finnish Acromegaly Study Group. Increased cancer incidence in acromegaly—a nationwide survey. *Clin Endocrinol (Oxf)*. 2010;**72**(2):278–279.
150. Kurimoto M, Fukuda I, Hizuka N, Takano K. The prevalence of benign and malignant tumors in patients with acromegaly at a single institute. *Endocr J*. 2008;**55**(1):67–71.
151. Maione L, Brue T, Beckers A, Delemer B, Petrossians P, Borson-Chazot F, Chabre O, François P, Bertherat J, Cortet-Rudelli C, Chanson P; French Acromegaly Registry Group. Changes in the management and comorbidities of acromegaly over three decades: the French Acromegaly Registry. *Eur J Endocrinol*. 2017;**176**(5):645–655.
152. Mercado M, Gonzalez B, Vargas G, Ramirez C, de los Monteros AL, Sosa E, Jervis P, Roldan P, Mendoza V, López-Félix B, Guinto G. Successful mortality reduction and control of comorbidities in patients with acromegaly followed at a highly specialized multidisciplinary clinic. *J Clin Endocrinol Metab*. 2014;**99**(12):4438–4446.
153. Mestron A, Webb SM, Astorga R, Benito P, Catala M, Gaztambide S, Gomez JM, Halperin I, Lucas-Morante T, Moreno B, Obols G, de Pablo P, Paramo C, Pico A, Torres E, Varela C, Vazquez JA, Zamora J, Albareda M, Gilabert M. Epidemiology, clinical characteristics, outcome, morbidity and mortality in acromegaly based on the Spanish Acromegaly Registry (Registro Espanol de Acromegalia, REA). *Eur J Endocrinol*. 2004;**151**(4): 439–446.
154. Nabarro JD. Acromegaly. *Clin Endocrinol (Oxf)*. 1987;**26**(4):481–512.
155. Orme SM, McNally RJ, Cartwright RA, Belchetz PE; United Kingdom Acromegaly Study Group. Mortality and cancer incidence in acromegaly: a retrospective cohort study. *J Clin Endocrinol Metab*. 1998;**83**(8):2730–2734.
156. Petroff D, Tönjes A, Grussendorf M, Droste M, Dimopolou C, Stalla G, Jausch-Hancke C, Mai M, Schopohl J, Schöfl C. The incidence of cancer among acromegaly patients: results from the German Acromegaly Registry. *J Clin Endocrinol Metab*. 2015;**100**(10):3894–3902.
157. Popovic V, Damjanovic S, Micic D, Nesovic M, Djurovic M, Petakov M, Obradovic S, Zoric S, Simic M, Penecic Z, Marinkovic J; The Pituitary Study Group. Increased incidence of neoplasia in patients with pituitary adenomas. *Clin Endocrinol (Oxf)*. 1998;**49**(4):441–445.
158. Ritchie CM, Atkinson AB, Kennedy AL, Lyons AR, Gordon DS, Fannin T, Hadden DR. Ascertainment and natural history of treated acromegaly in Northern Ireland. *Ulster Med J*. 1990;**59**(1):55–62.
159. Ron E, Gridley G, Hrubec Z, Page W, Arora S, Fraumeni JF Jr. Acromegaly and gastrointestinal cancer. *Cancer*. 1991;**68**(8):1673–1677.
160. Terzolo M, Reimondo G, Berchiella P, Ferrante E, Malchiodi E, De Marinis L, Pivonello R, Grotto S, Losa M, Cannavò S, Ferone D, Montini M, Bondanelli M, De Menis E, Martini C, Puxeddu E, Velardo A, Peri A, Faustini-Fustini M, Tita P, Pigliaru F, Peraga G, Borretta G, Scaroni C, Bazzoni N, Bianchi A, Berton A, Serban AL, Baldelli R, Fatti LM, Colao A, Arosio M; Italian Study Group of Acromegaly. Acromegaly is associated with increased cancer risk: a survey in Italy. *Endocr Relat Cancer*. 2017;**24**(9): 495–504.
161. Wolinski K, Stangierski A, Dyrda K, Nowicka K, Pelka M, Iqbal A, Car A, Lazizi M, Bednarek N, Czarnywojtek A, Gurgul E, Ruchala M. Risk of malignant neoplasms in acromegaly: a case-control study. *J Endocrinol Invest*. 2017;**40**(3):319–322.
162. Petrossians P, Daly AF, Natchev E, Maione L, Blijdorp K, Sahnoun-Fathallah M, Auriemma R, Diallo AM, Hulting AL, Ferone D, Hana V Jr, Filipponi S, Sievers C, Nogueira C, Fajardo-Montañana C, Carvalho D, Hana V, Stalla GK, Jaffrain-Réa ML, Delemer B, Colao A, Brue T, Neggers SJCM, Zacharieva S, Chanson P, Beckers A. Acromegaly at diagnosis in 3173 patients from the Liège Acromegaly Survey (LAS) Database. *Endocr Relat Cancer*. 2017;**24**(10):505–518.
163. Gadelha MR, Kasuki L, Lim DS, Fleseriu M. Systemic complications of acromegaly and the impact of the current treatment landscape: an update. *Endocr Rev*. 2019;**40**(1):268–332.
164. Lois K, Bukowczan J, Perros P, Jones S, Gunn M, James RA. The role of colonoscopic screening in acromegaly revisited: review of current literature and practice guidelines. *Pituitary*. 2015;**18**(4):568–574.
165. Tirosh A, Shimon I. Complications of acromegaly: thyroid and colon. *Pituitary*. 2017;**20**(1):70–75.
166. Melmed S, Bronstein MD, Chanson P, Klibanski A, Casanueva FF, Wass JAH, Strasburger CJ, Luger A, Clemmons DR, Giustina A. A consensus statement on acromegaly therapeutic outcomes. *Nat Rev Endocrinol*. 2018;**14**(9):552–561.
167. Dekkers OM, Biermasz NR, Pereira AM, Romijn JA, Vandenbroucke JP. Mortality in acromegaly: a metaanalysis. *J Clin Endocrinol Metab*. 2008;**93**(1): 61–67.
168. Holdaway IM. Excess mortality in acromegaly. *Horm Res*. 2007;**68**(Suppl 5):166–172.
169. Holdaway IM, Bolland MJ, Gamble GD. A meta-analysis of the effect of lowering serum levels of GH and IGF-I on mortality in acromegaly. *Eur J Endocrinol*. 2008;**159**(2):89–95.
170. Ritvonen E, Löytyniemi E, Jaatinen P, Ebeling T, Moilanen L, Nuutila P, Kauppinen-Mäkelin R, Schalin-Jäntti C. Mortality in acromegaly: a 20-year follow-up study. *Endocr Relat Cancer*. 2016;**23**(6): 469–480.
171. Arosio M, Reimondo G, Malchiodi E, Berchiella P, Borriacino A, De Marinis L, Pivonello R, Grotto S, Losa M, Cannavò S, Minuto F, Montini M, Bondanelli M, De Menis E, Martini C, Angeletti G, Velardo A, Peri A, Faustini-Fustini M, Tita P, Pigliaru F, Borretta G, Scaroni C, Bazzoni N, Bianchi A, Appetecchia M, Cavagnini F, Lombardi G, Ghigo E, Beck-Peccoz P, Colao A, Terzolo M; Italian Study Group of Acromegaly. Predictors of morbidity and mortality in acromegaly: an Italian survey. *Eur J Endocrinol*. 2012;**167**(2):189–198.
172. Bogazzi F, Colao A, Rossi G, Lombardi M, Urbani C, Sardella C, Iannelli A, Scattina I, Manetti L, Del Sarto S, Pivonello R, Grasso LF, Lupi I, Auriemma RS, Lombardi G, Martino E. Comparison of the effects of primary somatostatin analogue therapy and pituitary adenectomy on survival in patients with acromegaly: a retrospective cohort study. *Eur J Endocrinol*. 2013;**169**(3):367–376.
173. Colao A, Vandevas S, Pivonello R, Grasso LF, Nachev E, Auriemma R, Kalinov K, Zacharieva S. Could different treatment approaches in acromegaly influence life expectancy? A comparative study between Bulgaria and Campania (Italy). *Eur J Endocrinol*. 2014;**171**(2):263–273.
174. Esposito D, Ragnarsson O, Granfeldt D, Marlow T, Johannsson G, Olsson DS. Decreasing mortality and changes in treatment patterns in patients with acromegaly from a nationwide study. *Eur J Endocrinol*. 2018;**178**(5):459–469.
175. Sherlock M, Reulen RC, Alonso AA, Ayuk J, Clayton RN, Sheppard MC, Hawkins MM, Bates AS, Stewart

- PM. ACTH deficiency, higher doses of hydrocortisone replacement, and radiotherapy are independent predictors of mortality in patients with acromegaly. *J Clin Endocrinol Metab.* 2009;**94**(11):4216–4223.
176. Varadhan L, Reulen RC, Brown M, Clayton RN. The role of cumulative growth hormone exposure in determining mortality and morbidity in acromegaly: a single centre study. *Pituitary.* 2016;**19**(3):251–261.
  177. Wu TE, Lin HD, Lu RA, Wang ML, Chen RL, Chen HS. The role of insulin-like growth factor-1 and growth hormone in the mortality of patients with acromegaly after trans-sphenoidal surgery. *Growth Horm IGF Res.* 2010;**20**(6):411–415.
  178. Bolfi F, Neves AF, Boguszewski CL, Nunes-Nogueira VS. Mortality in acromegaly decreased in the last decade: a systematic review and meta-analysis. *Eur J Endocrinol.* 2018;**179**(1):59–71.
  179. Growth hormone treatment and leukemia. *CMAJ.* 1988;**139**(9):877.
  180. Stahnke N. Leukemia in growth-hormone-treated patients: an update, 1992. *Horm Res.* 1992;**38**(Suppl 1):56–62.
  181. Watanabe S, Yamaguchi N, Tsunematsu Y, Komiyama A. Risk factors for leukemia occurrence among growth hormone users. *Jpn J Cancer Res.* 1989;**80**(9):822–825.
  182. Allen DB, Rundle AC, Graves DA, Blethen SL. Risk of leukemia in children treated with human growth hormone: review and reanalysis. *J Pediatr.* 1997;**131**(1 Pt 2):S32–S36.
  183. Bell J, Parker KL, Swinford RD, Hoffman AR, Maneatis T, Lippe B. Long-term safety of recombinant human growth hormone in children. *J Clin Endocrinol Metab.* 2010;**95**(1):167–177.
  184. Fradkin JE, Mills JL, Schonberger LB, Wysowski DK, Thomson R, Durako SJ, Robison LL. Risk of leukemia after treatment with pituitary growth hormone. *JAMA.* 1993;**270**(23):2829–2832.
  185. Maneatis T, Baptista J, Connelly K, Blethen S. Growth hormone safety update from the National Cooperative Growth Study. *J Pediatr Endocrinol Metab.* 2000;**13**(Suppl 2):1035–1044.
  186. Nishi Y, Tanaka T, Takano K, Fujieda K, Igarashi Y, Hanew K, Hirano T, Yokoya S, Tachibana K, Saito T, Watanabe S. Recent study in the occurrence of leukemia in growth hormone-treated patients in Japan. GH Treatment Study Committee of the Foundation for Growth Science, Japan. *J Clin Endocrinol Metab.* 1999;**84**(6):1961–1965.
  187. Arslanian SA, Becker DJ, Lee PA, Drash AL, Foley TP Jr. Growth hormone therapy and tumor recurrence. Findings in children with brain neoplasms and hypopituitarism. *Am J Dis Child.* 1985;**139**(4):347–350.
  188. Clayton PE, Shalet SM, Gattamaneni HR, Price DA. Does growth hormone cause relapse of brain tumors? *Lancet.* 1987;**1**(8535):711–713.
  189. Patterson BC, Chen Y, Sklar CA, Neglia J, Yasui Y, Mertens A, Armstrong GT, Meadows A, Scovall M, Robison LL, Meacham LR. Growth hormone exposure as a risk factor for the development of subsequent neoplasms of the central nervous system: a report from the childhood cancer survivor study. *J Clin Endocrinol Metab.* 2014;**99**(6):2030–2037.
  190. Rohrer TR, Langer T, Grabenbauer GG, Buchfelder M, Glowatzki M, Dörr HG. Growth hormone therapy and the risk of tumor recurrence after brain tumor treatment in children. *J Pediatr Endocrinol Metab.* 2010;**23**(9):935–942.
  191. Sklar CA, Mertens AC, Mitby P, Occhiogrosso G, Qin J, Heller G, Yasui Y, Robison LL. Risk of disease recurrence and second neoplasms in survivors of childhood cancer treated with growth hormone: a report from the Childhood Cancer Survivor Study. *J Clin Endocrinol Metab.* 2002;**87**(7):3136–3141.
  192. Swerdlow AJ, Reddingius RE, Higgins CD, Spoudeas HA, Phipps K, Qiao Z, Ryder WD, Brada M, Hayward RD, Brook CG, Hindmarsh PC, Shalet SM. Growth hormone treatment of children with brain tumors and risk of tumor recurrence. *J Clin Endocrinol Metab.* 2000;**85**(12):4444–4449.
  193. Stochholm K, Kiess W. Long-term safety of growth hormone—a combined registry analysis. *Clin Endocrinol (Oxf).* 2018;**88**(4):515–528.
  194. Libruder C, Blumenfeld O, Dichtiar R, Laron Z, Zadik Z, Shohat T, Afek A. Mortality and cancer incidence among patients treated with recombinant growth hormone during childhood in Israel. *Clin Endocrinol (Oxf).* 2016;**85**(5):813–818.
  195. Shen L, Sun CM, Li XT, Liu CJ, Zhou YX. Growth hormone therapy and risk of recurrence/progression in intracranial tumors: a meta-analysis. *Neurol Sci.* 2015;**36**(10):1859–1867.
  196. Wang ZF, Chen HL. Growth hormone treatment and risk of recurrence or development of secondary neoplasms in survivors of pediatric brain tumors. *J Clin Neurosci.* 2014;**21**(12):2155–2159.
  197. Alotaibi NM, Noormohamed N, Cote DJ, Alharthi S, Doucette J, Zaidi HA, Mekary RA, Smith TR. Physiologic growth hormone-replacement therapy and craniopharyngioma recurrence in pediatric patients: a meta-analysis. *World Neurosurg.* 2018;**109**:487–496.e1.
  198. Deodati A, Ferroli BB, Cianfarani S. Association between growth hormone therapy and mortality, cancer and cardiovascular risk: systematic review and meta-analysis. *Growth Horm IGF Res.* 2014;**24**(4):105–111.
  199. Swerdlow AJ, Cooke R, Albertsson-Wikland K, Borgström B, Butler G, Cianfarani S, Clayton P, Coste J, Deodati A, Ecosse E, Gausche R, Giacomozzi C, Kiess W, Hokken-Koelega AC, Kuehni CE, Landier F, Maes M, Mullis PE, Pfaffle R, Sävendahl L, Sommer G, Thomas M, Tollerfield S, Zandwijken GR, Carel JC. Description of the SAGhE cohort: a large European study of mortality and cancer incidence risks after childhood treatment with recombinant growth hormone. *Horm Res Paediatr.* 2015;**84**(3):172–183.
  200. Carel JC, Ecosse E, Landier F, Meguellati-Hakkas D, Kaguelidou F, Rey G, Coste J. Long-term mortality after recombinant growth hormone treatment for isolated growth hormone deficiency or childhood short stature: preliminary report of the French SAGhE study. *J Clin Endocrinol Metab.* 2012;**97**(2):416–425.
  201. Sävendahl L, Maes M, Albertsson-Wikland K, Borgström B, Carel JC, Henard S, Speybroeck N, Thomas M, Zandwijken G, Hokken-Koelega A. Long-term mortality and causes of death in isolated GHD, ISS, and SGA patients treated with recombinant growth hormone during childhood in Belgium, The Netherlands, and Sweden: preliminary report of 3 countries participating in the EU SAGhE study. *J Clin Endocrinol Metab.* 2012;**97**(2):E213–E217.
  202. Swerdlow AJ, Cooke R, Beckers D, Borgström B, Butler G, Carel JC, Cianfarani S, Clayton P, Coste J, Deodati A, Ecosse E, Gausche R, Giacomozzi C, Hokken-Koelega ACS, Khan AJ, Kiess W, Kuehni CE, Mullis PE, Pfaffle R, Sävendahl L, Sommer G, Thomas M, Tidblad A, Tollerfield S, Van Eycken L, Zandwijken GR. Cancer risks in patients treated with growth hormone in childhood: the SAGhE European cohort study. *J Clin Endocrinol Metab.* 2017;**102**(5):1661–1672.
  203. Jorge AA, Malaquias AC, Arnhold JJ, Mendonça BB. Noonan syndrome and related disorders: a review of clinical features and mutations in genes of the RAS/MAPK pathway. *Horm Res.* 2009;**71**(4):185–193.
  204. Kratz CP, Franke L, Peters H, Kohlschmidt N, Kazmierczak B, Finckh U, Bier A, Eichhorn B, Blank C, Kraus C, Kohlhasse J, Pauli S, Wildhardt G, Kutsche K, Auber B, Christmann A, Bachmann N, Mitter D, Cremer FW, Mayer K, Daumer-Haas C, Nevinny-Stickel-Hinzpeter C, Oeffner F, Schlüter G, Gencik M, Überlackner B, Lisowski C, Schanze I, Greene MH, Spix C, Zenker M. Cancer spectrum and frequency among children with Noonan, Costello, and cardio-facio-cutaneous syndromes. *Br J Cancer.* 2015;**112**(8):1392–1397.
  205. Rauen KA, Huson SM, Burkitt-Wright E, Evans DG, Farschtschi S, Ferner RE, Gutmann DH, Hanemann CO, Kerr B, Legius E, Parada LF, Patton M, Peltonen J, Ratner N, Riccardi VM, van der Vaart T, Vikkula M, Viskochil DH, Zenker M, Upadhyaya M. Recent developments in neurofibromatosis and RASopathies: management, diagnosis and current and future therapeutic avenues. *Am J Med Genet A.* 2015;**167A**(1):1–10.
  206. Tidyman WE, Rauen KA. The RASopathies: developmental syndromes of Ras/MAPK pathway dysregulation. *Curr Opin Genet Dev.* 2009;**19**(3):230–236.
  207. Villani A, Greer MC, Kalish JM, Nakagawara A, Nathanson KL, Pajtlar KW, Pfister SM, Walsh MF, Wasserman JD, Zellek K, Kratz CP. Recommendations for cancer surveillance in individuals with RASopathies and other rare genetic conditions with increased cancer risk. *Clin Cancer Res.* 2017;**23**(12):e83–e90.
  208. Jongmans MC, van der Burgt I, Hoogerbrugge PM, Noordam K, Yntema HG, Nillesen WM, Kuiper RP, Ligtenberg MJ, van Kessel AG, van Krieken JH, Kiemeneij LA, Hoogerbrugge N. Cancer risk in patients with Noonan syndrome carrying a PTPN11 mutation. *Eur J Hum Genet.* 2011;**19**(8):870–874.
  209. Roberts AE, Allanson JE, Tartaglia M, Gelb BD. Noonan syndrome. *Lancet.* 2013;**381**(9863):333–342.
  210. Bangalore Krishna K, Pagan P, Escobar O, Popovic J. Occurrence of cranial neoplasms in pediatric patients with Noonan syndrome receiving growth hormone: is screening with brain MRI prior to initiation of growth hormone indicated? *Horm Res Paediatr.* 2017;**88**(6):423–426.
  211. McWilliams GD, SantaCruz K, Hart B, Clericuzio C. Occurrence of DNET and other brain tumors in Noonan syndrome warrants caution with growth hormone therapy. *Am J Med Genet A.* 2016;**170A**(1):195–201.
  212. Petryk A, Kanakatti Shankar R, Giri N, Hollenberg AN, Rutter MM, Nathan B, Lodish M, Alter BP, Stratakis CA, Rose SR. Endocrine disorders in Fanconi anemia: recommendations for screening and treatment. *J Clin Endocrinol Metab.* 2015;**100**(3):803–811.
  213. Ehlayel M, Soliman A, De Sanctis V. Linear growth and endocrine function in children with ataxia telangiectasia. *Indian J Endocrinol Metab.* 2014;**18**(Suppl 1):S93–S96.
  214. Cunniff C, Bassetti JA, Ellis NA. Bloom's syndrome: clinical spectrum, molecular pathogenesis, and cancer predisposition. *Mol Syndromol.* 2017;**8**(1):4–23.
  215. Mezei G, Sudan M, Izraeli S, Kheifets L. Epidemiology of childhood leukemia in the presence and absence of Down syndrome. *Cancer Epidemiol.* 2014;**38**(5):479–489.
  216. Bukowska B, Karwowski BT. Actual state of knowledge in the field of diseases related with

- defective nucleotide excision repair. *Life Sci.* 2018; **195**:6–18.
217. Casanova M, Selicorni A, Ferrari A. Cancer predisposition in children with Kabuki syndrome. *Am J Med Genet A.* 2011; **155A**(6):1504.
218. Karlberg N, Karlberg S, Karikoski R, Mikkola S, Lipsanen-Nyman M, Jalanko H. High frequency of tumours in Mulibrey nanism. *J Pathol.* 2009; **218**(2): 163–171.
219. Stewart DR, Pemov A, Johnston JJ, Sapp JC, Yeager M, He J, Boland JF, Burdett L, Brown C, Gatti RA, Alter BP, Biesecker LG, Savage SA. Dubowitz syndrome is a complex comprised of multiple, genetically distinct and phenotypically overlapping disorders. *PLoS One.* 2014; **9**(6):e98686.
220. van der Burgt I, Chrzanowska KH, Smeets D, Weemaes C. Nijmegen breakage syndrome. *J Med Genet.* 1996; **33**(2):153–156.
221. Taylor AM. Chromosome instability syndromes. *Best Pract Res Clin Haematol.* 2001; **14**(3):631–644.
222. Croonen EA, Yntema HG, van Minkelen R, van den Ouweland AM, van der Burgt I. Patient with a neurofibromatosis type 1 mutation but a clinical diagnosis of Noonan syndrome. *Clin Dysmorphol.* 2012; **21**(4):212–214.
223. Renes JS, Willemssen RH, Wagner A, Finken MJ, Hokken-Koelega AC. Bloom syndrome in short children born small for gestational age: a challenging diagnosis. *J Clin Endocrinol Metab.* 2013; **98**(10): 3932–3938.
224. Raman S, Grimberg A, Waguespack SC, Miller BS, Sklar CA, Meacham LR, Patterson BC. Risk of neoplasia in pediatric patients receiving growth hormone therapy—a report from the Pediatric Endocrine Society Drug and Therapeutics Committee. *J Clin Endocrinol Metab.* 2015; **100**(6):2192–2203.
225. Allen DB, Backeljauw P, Bidlingmaier M, Biller BM, Boguszewski M, Burman P, Butler G, Chihara K, Christiansen J, Cianfarani S, Clayton P, Clemmons D, Cohen P, Darendeliler F, Deal C, Dunger D, Erfurth EM, Fuqua JS, Grimberg A, Haymond M, Higham C, Ho K, Hoffman AR, Hokken-Koelega A, Johannsson G, Juul A, Kopchick J, Lee P, Pollak M, Radovick S, Robison L, Rosenfeld R, Ross RJ, Savendahl L, Saenger P, Toft Sorensen H, Stochholm K, Strasburger C, Swerdlow A, Thorner M. GH safety workshop position paper: a critical appraisal of recombinant human GH therapy in children and adults. *Eur J Endocrinol.* 2016; **174**(2):1–9.
226. Bave A, Tewari S, Sisson A, Chintagumpala M, Anderson M, Paulino AC. Meta-analysis of the incidence and patterns of second neoplasms after photon craniospinal irradiation in children with medulloblastoma. *Pediatr Blood Cancer.* 2018; **65**(8):e27095.
227. Ng AK, Kenney LB, Gilbert ES, Travis LB. Secondary malignancies across the age spectrum. *Semin Radiat Oncol.* 2010; **20**(1):67–78.
228. Boguszewski CL. Update on GH therapy in adults. *F1000 Res.* 2017; **6**:2017.
229. Molitch ME, Clemmons DR, Malozowski S, Merriam GR, Vance ML; Endocrine Society. Evaluation and treatment of adult growth hormone deficiency: an Endocrine Society clinical practice guideline. *J Clin Endocrinol Metab.* 2011; **96**(6):1587–1609.
230. Child CJ, Zimmermann AG, Woodmansee WW, Green DM, Li JJ, Jung H, Erfurth EM, Robison LL; HypoCCS International Advisory Board. Assessment of primary cancers in GH-treated adult hypopituitary patients: an analysis from the Hypopituitary Control and Complications Study. *Eur J Endocrinol.* 2011; **165**(2):217–223.
231. Krzyzanowska-Mittermayer K, Mattsson AF, Maiter D, Feldt-Rasmussen U, Camacho-Hübner C, Luger A, Abs R. New neoplasm during GH replacement in adults with pituitary deficiency following malignancy: a KIMS analysis. *J Clin Endocrinol Metab.* 2018; **103**(2):523–531.
232. Burman P, Mattsson AF, Johannsson G, Höybye C, Holmer H, Dahlqvist P, Berinder K, Engström BE, Ekman B, Erfurth EM, Svensson J, Wahlberg J, Karlsson FA. Deaths among adult patients with hypopituitarism: hypocortisolism during acute stress, and de novo malignant brain tumors contribute to an increased mortality. *J Clin Endocrinol Metab.* 2013; **98**(4):1466–1475.
233. van Bunderen CC, van Nieuwpoort IC, Arwert LI, Heymans MW, Franken AA, Koppeschaar HP, van der Lely AJ, Drent ML. Does growth hormone replacement therapy reduce mortality in adults with growth hormone deficiency? Data from the Dutch National Registry of Growth Hormone Treatment in Adults. *J Clin Endocrinol Metab.* 2011; **96**(10):3151–3159.
234. Stochholm K, Johannsson G. Reviewing the safety of GH replacement therapy in adults. *Growth Horm IGF Res.* 2015; **25**(4):149–157.
235. Jasim S, Alahdab F, Ahmed AT, Tamhane SU, Sharma A, Donegan D, Nippoldt TB, Murad MH. The effect of growth hormone replacement in patients with hypopituitarism on pituitary tumor recurrence, secondary cancer, and stroke. *Endocrine.* 2017; **56**(2):267–278.
236. Li Z, Zhou Q, Li Y, Fu J, Huang X, Shen L. Growth hormone replacement therapy reduces risk of cancer in adult with growth hormone deficiency: a meta-analysis. *Oncotarget.* 2016; **7**(49):81862–81869.
237. Zarandi M, Cai R, Kovacs M, Popovics P, Szalontay L, Cui T, Sha W, Jaszberenyi M, Varga J, Zhang X, Block NL, Rick FG, Halmos G, Schally AV. Synthesis and structure-activity studies on novel analogs of human growth hormone releasing hormone (GHRH) with enhanced inhibitory activities on tumor growth. *Peptides.* 2017; **89**:60–70.
238. Evans A, Jamieson SM, Liu DX, Wilson WR, Perry JK. Growth hormone receptor antagonism suppresses tumour regrowth after radiotherapy in an endometrial cancer xenograft model. *Cancer Lett.* 2016; **379**(1):117–123.
239. Girgert R, Emons G, Gründker C. Inhibition of growth hormone receptor by Somavert reduces expression of GPER and prevents growth stimulation of triple-negative breast cancer by 17 $\beta$ -estradiol. *Oncol Lett.* 2018; **15**(6):9559–9566.
240. Zhou D, Zhang YL, Liang D, Yuan Y, Zeng D, Chen J, Yang J. Effect of combination therapy of siRNA targeting growth hormone receptor and 5-fluorouracil in hepatic metastasis of colon cancer. *Oncol Lett.* 2015; **10**(6):3505–3509.
241. Belfiore A, Malaguarnera R, Vella V, Lawrence MC, Sciacca L, Frasca F, Morrione A, Vigneri R. Insulin receptor isoforms in physiology and disease: an updated view. *Endocr Rev.* 2017; **38**(5):379–431.
242. Ekyalongo RC, Yee D. Revisiting the IGF-1R as a breast cancer target. *NPJ Precis Oncol.* 2017; **1**(1):14.
243. Gallagher EJ, LeRoith D. Minireview: IGF, insulin, and cancer. *Endocrinology.* 2011; **152**(7):2546–2551.
244. Pollak M. The insulin and insulin-like growth factor receptor family in neoplasia: an update. *Nat Rev Cancer.* 2012; **12**(3):159–169.
245. de Bono JS, Piulats JM, Pandha HS, Petrylak DP, Saad F, Aparicio LM, Sandhu SK, Fong P, Gillesen S, Hudes GR, Wang T, Scranton J, Pollak MN. Phase II randomized study of figitumumab plus docetaxel and docetaxel alone with crossover for metastatic castration-resistant prostate cancer. *Clin Cancer Res.* 2014; **20**(7):1925–1934.
246. Scagliotti GV, Bondarenko I, Blackhall F, Barlesi F, Hsia TC, Jassem J, Milanowski J, Popat S, Sanchez-Torres JM, Novello S, Benner RJ, Green S, Molpus K, Soria JC, Shepherd FA. Randomized, phase III trial of figitumumab in combination with erlotinib versus erlotinib alone in patients with nonadenocarcinoma nonsmall-cell lung cancer. *Ann Oncol.* 2015; **26**(3):497–504.
247. Wu JD, Haug K, Coleman I, Woodke L, Vessella R, Nelson P, Montgomery RB, Ludwig DL, Plymate SR. Combined in vivo effect of A12, a type 1 insulin-like growth factor receptor antibody, and docetaxel against prostate cancer tumors. *Clin Cancer Res.* 2006; **12**(20 Pt 1):6153–6160.
248. Gao J, Chesebrough JW, Cartledge SA, Ricketts SA, Incognito L, Veldman-Jones M, Blakey DC, Tabrizi M, Jallal B, Trail PA, Coats S, Bosslet K, Chang YS. Dual IGF-I/II-neutralizing antibody MEDI-573 potently inhibits IGF signaling and tumor growth. *Cancer Res.* 2011; **71**(3):1029–1040.
249. Iguchi H, Nishina T, Nogami N, Kozuki T, Yamagiwa Y, Yagawa K. Phase I dose-escalation study evaluating safety, tolerability and pharmacokinetics of MEDI-573, a dual IGF-I/II neutralizing antibody, in Japanese patients with advanced solid tumours. *Invest New Drugs.* 2015; **33**(1):194–200.
250. Wang N, Rayes RF, Elahi SM, Lu Y, Hancock MA, Massie B, Rowe GE, Aomari H, Hossain S, Durocher Y, Pinard M, Tabariés S, Siegel PM, Brodt P. The IGF-Trap: novel inhibitor of carcinoma growth and metastasis. *Mol Cancer Ther.* 2015; **14**(4):982–993.
251. Zhong H, Fazelnabaker C, Breen S, Chen C, Huang J, Morehouse C, Yao Y, Hollingsworth RE. MEDI-573, alone or in combination with mammalian target of rapamycin inhibitors, targets the insulin-like growth factor pathway in sarcomas. *Mol Cancer Ther.* 2014; **13**(11):2662–2673.

## Acknowledgments

We thank Prof. John Kopchick for carefully reviewing our manuscript.

**Correspondence and Reprint Requests:** Cesar L. Boguszewski, MD, PhD, Department of Internal Medicine, SEMP, Endocrine Division, Federal University of Paraná, Avenida Agostinho Leao Junior 285, 80030-110 Curitiba, State of Paraná, Brazil. E-mail: [clbogus@uol.com.br](mailto:clbogus@uol.com.br).

**Disclosure Summary:** M.C.d.S.B. has received speaker's honoraria from Sandoz and Pfizer and serves on the Board of the Growth Hormone Research Society. C.L.B. has received consultation fees from Ipsen, Novartis, and Pfizer, unrelated to the topic of this article.

## Abbreviations

Akt, protein kinase B; AR, androgen receptor; CNS, central nervous system; CRC, colorectal cancer; EMT, epithelial-to-mesenchymal transition; GHD, GH deficiency; GHR, GH receptor; GHRH-R, GHRH receptor; IGFBP, IGF-binding protein; INS, insulin; INS-R, INS receptor; ISS, idiopathic short stature; NS, Noonan syndrome; PI3K, phosphoinositide 3-kinase; PRLR, prolactin receptor; SAGe, Safety and Appropriateness of Growth Hormone Treatments in Europe; SGA, small for gestational age; SIR, standardized incidence ratio; SMR, standardized mortality ratio; SNP, single-nucleotide polymorphism; STAT, signal transducer and activator of transcription; Tg, transgenic.
